# Supplementary material for: Synthesis and electronic properties of 3,7-dianilino substituted N-hexyl phenothiazines
Source: Royal Society of Chemistry journal article supplement (doi:10.1039/c3ob40815a), 2013-01-01
Supplement: c3ob40815a.pdf [file c3ob40815a.pdf]

## Supporting Information

### Synthesis and electronic properties of 3,7-dianilino substituted *N*-hexyl phenothiazines

Iani S. Perețeanu,<sup>a,b</sup> and Thomas J. J. Müller<sup>\*a</sup>

<sup>a</sup>Institut für Organische Chemie und Makromolekulare Chemie, Heinrich-Heine-Universität Düsseldorf Universitätsstraße 1, 40225 Düsseldorf, Germany  
Email: [ThomasJJ.Mueller@uni-duesseldorf.de](mailto:ThomasJJ.Mueller@uni-duesseldorf.de)

<sup>b</sup>Babeș-Bolyai University Cluj-Napoca, Faculty of Chemistry and Chemical Engineering, Arany Janos St 11, Cluj-Napoca 400428, Romania

#### Table of contents

|                                                                                                                                                                                                         |    |
|---------------------------------------------------------------------------------------------------------------------------------------------------------------------------------------------------------|----|
| 1 <sup>1</sup> H and <sup>13</sup> C NMR spectra of 3,7-dianilino substituted <i>N</i> -hexyl phenothiazines <b>3a-3l</b> ....                                                                          | 3  |
| 1.1 Dimethyl 4,4'-((10-hexyl-10 <i>H</i> -phenothiazine-3,7-diyl)bis-(azanediyl))dibenzoate ( <b>3a</b> ) .....                                                                                         | 3  |
| 1.2 <i>N</i> <sup>3</sup> , <i>N</i> <sup>7</sup> -Bis(4-( <i>tert</i> -butyl)phenyl)-10-hexyl-10 <i>H</i> -phenothiazine-3,7-diamine ( <b>3b</b> ) .....                                               | 5  |
| 1.3 10-Hexyl- <i>N</i> <sup>3</sup> , <i>N</i> <sup>7</sup> -bis(4-methoxyphenyl)-10 <i>H</i> -phenothiazine-3,7-diamine ( <b>3c</b> ) .....                                                            | 7  |
| 1.4 <i>N</i> <sup>1</sup> , <i>N</i> <sup>1'</sup> -(10-Hexyl-10 <i>H</i> -phenothiazine-3,7-diyl)bis( <i>N</i> <sup>4</sup> , <i>N</i> <sup>4'</sup> -dimethylbenzene-1,4-diamine) ( <b>3d</b> ) ..... | 9  |
| 1.5 10-Hexyl- <i>N</i> <sup>3</sup> , <i>N</i> <sup>7</sup> -dimethyl- <i>N</i> <sup>3</sup> , <i>N</i> <sup>7</sup> -diphenyl-10 <i>H</i> -phenothiazine-3,7-diamine ( <b>3e</b> ) ...                 | 11 |
| 1.6 10-Hexyl- <i>N</i> <sup>3</sup> , <i>N</i> <sup>7</sup> -bis(4-methoxyphenyl)- <i>N</i> <sup>3</sup> , <i>N</i> <sup>7</sup> -dimethyl-10 <i>H</i> -phenothiazine-3,7-diamine ( <b>3f</b> ) .....   | 13 |
| 1.7 3,7-Di(9 <i>H</i> -carbazol-9-yl)-10-hexyl-10 <i>H</i> -phenothiazine ( <b>3g</b> ) .....                                                                                                           | 15 |
| 1.8 10-Hexyl- <i>N</i> <sup>3</sup> , <i>N</i> <sup>3</sup> , <i>N</i> <sup>7</sup> , <i>N</i> <sup>7</sup> -tetraphenyl-10 <i>H</i> -phenothiazine-3,7-diamine ( <b>3h</b> ) .....                     | 17 |
| 1.9 10-Hexyl- <i>N</i> <sup>3</sup> , <i>N</i> <sup>3</sup> , <i>N</i> <sup>7</sup> , <i>N</i> <sup>7</sup> -tetrakis(4-methoxyphenyl)-10 <i>H</i> -phenothiazine-3,7-diamine ( <b>3i</b> ) .....       | 19 |
| 1.10 <i>N</i> <sup>3</sup> , <i>N</i> <sup>3</sup> , <i>N</i> <sup>7</sup> , <i>N</i> <sup>7</sup> -tetraethyl-10-hexyl-10 <i>H</i> -phenothiazine-3,7-diamine ( <b>3j</b> ) .....                      | 21 |
| 1.11 10-Hexyl-3,7-di(piperidin-1-yl)-10 <i>H</i> -phenothiazine ( <b>3k</b> ) .....                                                                                                                     | 23 |

|                                                                                                                           |    |
|---------------------------------------------------------------------------------------------------------------------------|----|
| 1.12 10-Hexyl-3,7-di(pyrrolidin-1-yl)-10 <i>H</i> -phenothiazine ( <b>3I</b> ) .....                                      | 25 |
| 2 UV/Vis and emission spectra of 3,7-dianilino substituted <i>N</i> -hexyl phenothiazines<br><b>3a-3I</b> .....           | 27 |
| 3 Cyclic voltammograms of 3,7-dianilino substituted <i>N</i> -hexyl phenothiazines <b>3a-3I</b> ..                        | 33 |
| 4 Computed xyz-coordinates and energies of 3,7-dianilino substituted <i>N</i> -hexyl<br>phenothiazines <b>3a-3I</b> ..... | 39 |
| 5 Correlation graphs of selected experimental and computational electronic data of the<br>structures <b>3a-3I</b> .....   | 70 |

## 1 <sup>1</sup>H and <sup>13</sup>C NMR spectra of 3,7-dianilino substituted *N*-hexyl phenothiazines 3a-3l

### 1.1 Dimethyl 4,4'-((10-hexyl-10*H*-phenothiazine-3,7-diyl)bis-(azanediyl))dibenzoate (3a)

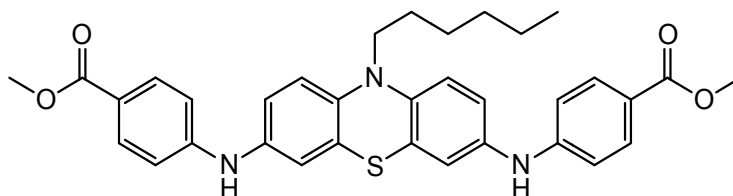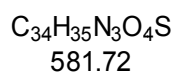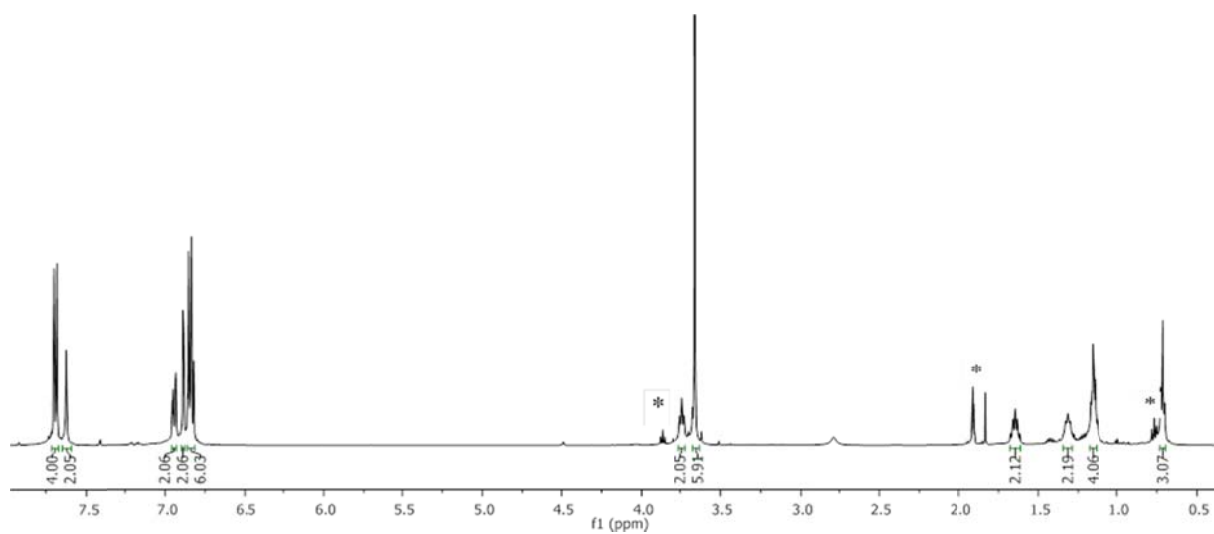

<sup>1</sup>H NMR (300 MHz) of **3a** (20 mg) in acetone-d<sub>6</sub> at 298 K.

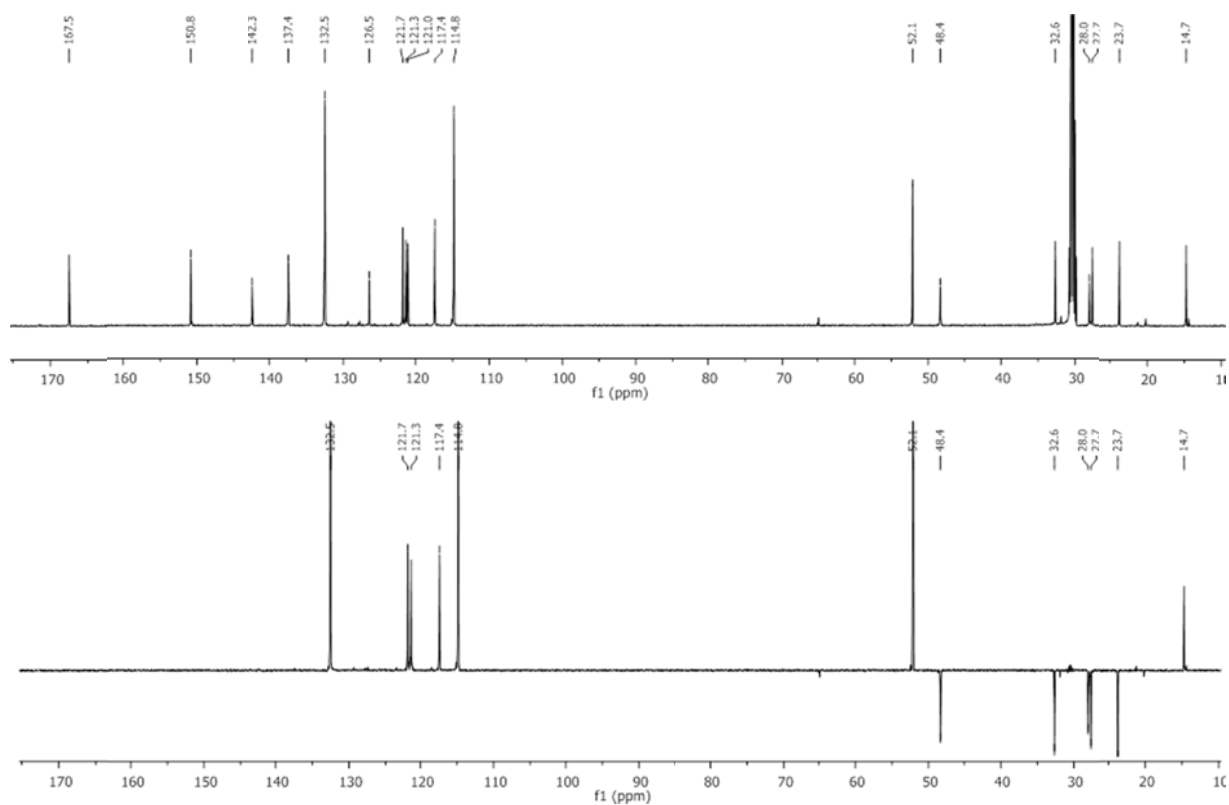

$^{13}\text{C}$  and  $^{13}\text{C}$ -DEPT 135 NMR (75 MHz) of **3a** (20 mg) in acetone- $d_6$  at 298 K.

## 1.2 $N^3, N^7$ -Bis(4-(*tert*-butyl)phenyl)-10-hexyl-10*H*-phenothiazine-3,7-diamine (**3b**)

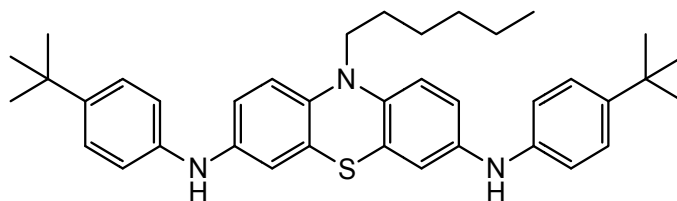

$C_{38}H_{47}N_3S$   
577.86

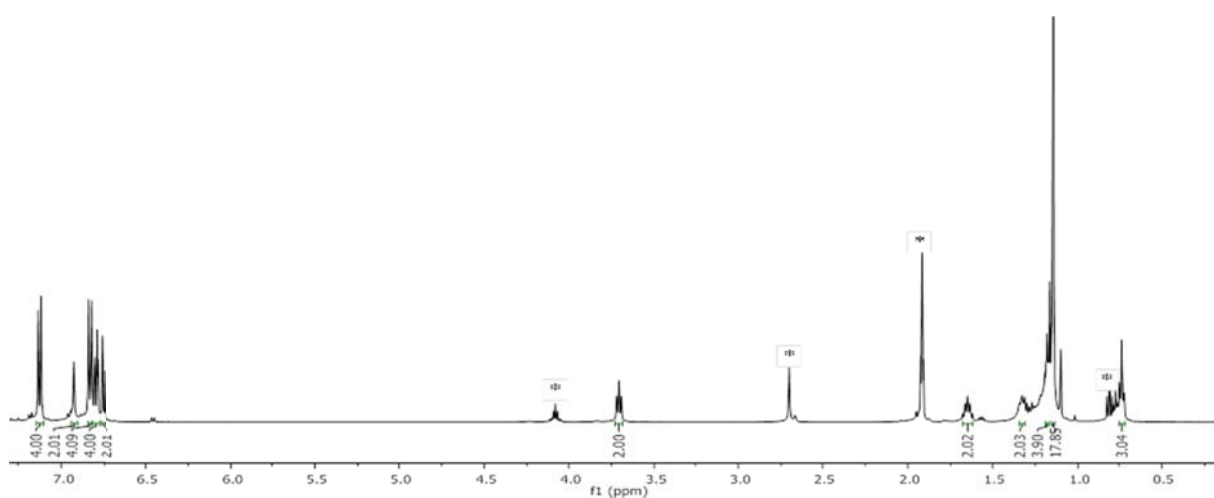

$^1H$  NMR (300 MHz) of **3b** (20 mg) in acetone- $d_6$  at 298 K.

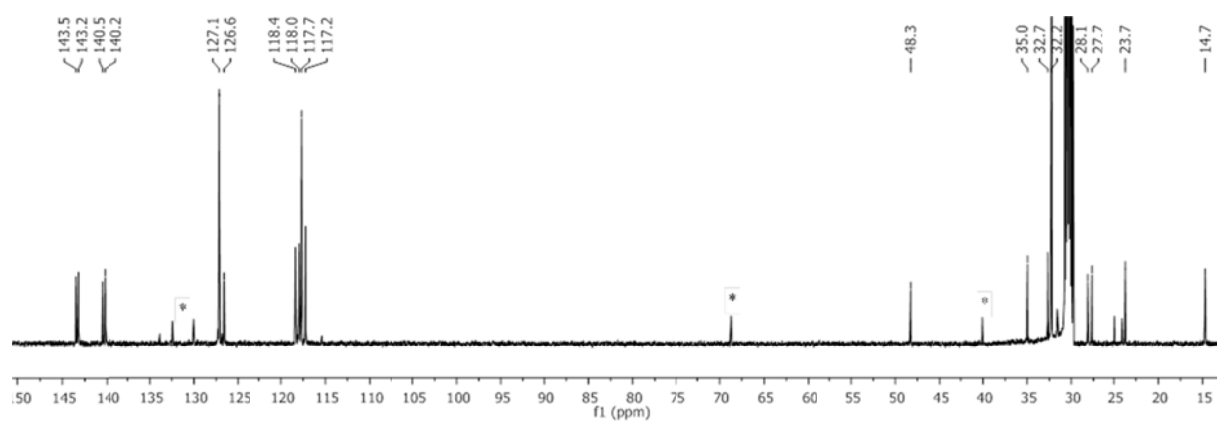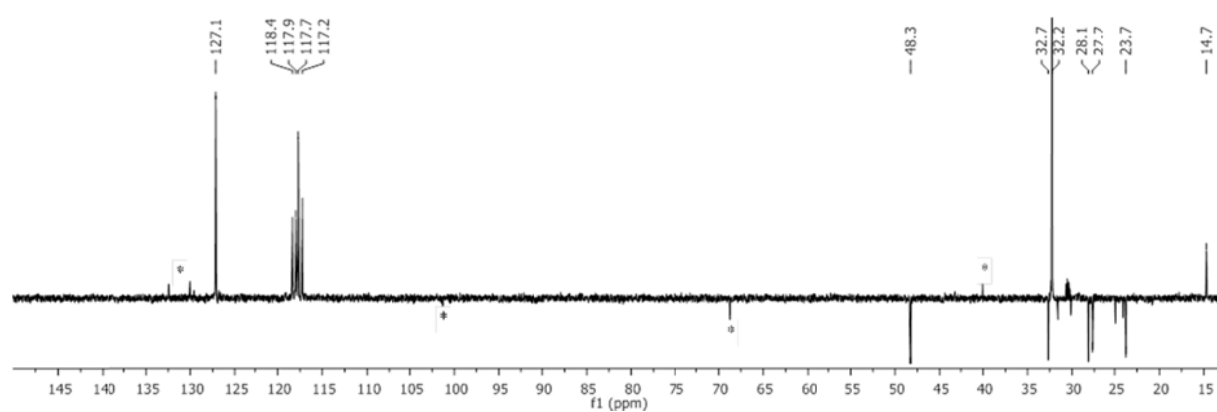

$^{13}\text{C}$  and  $^{13}\text{C}$ -DEPT 135 NMR (75 MHz) of **3b** (20 mg) in acetone- $\text{d}_6$  at 298 K.

### 1.3 10-Hexyl-*N*<sup>3</sup>,*N*<sup>7</sup>-bis(4-methoxyphenyl)-10*H*-phenothiazine-3,7-diamine (**3c**)

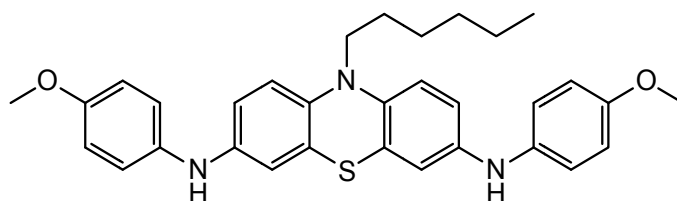

C<sub>32</sub>H<sub>35</sub>N<sub>3</sub>O<sub>2</sub>S  
525.70

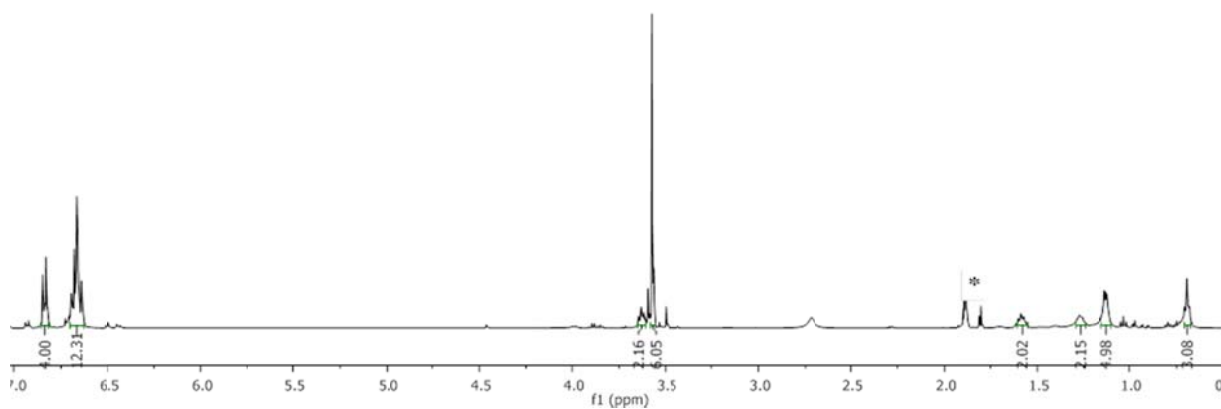

<sup>1</sup>H NMR (300 MHz) of **3c** (20 mg) in acetone-*d*<sub>6</sub> at 298 K.

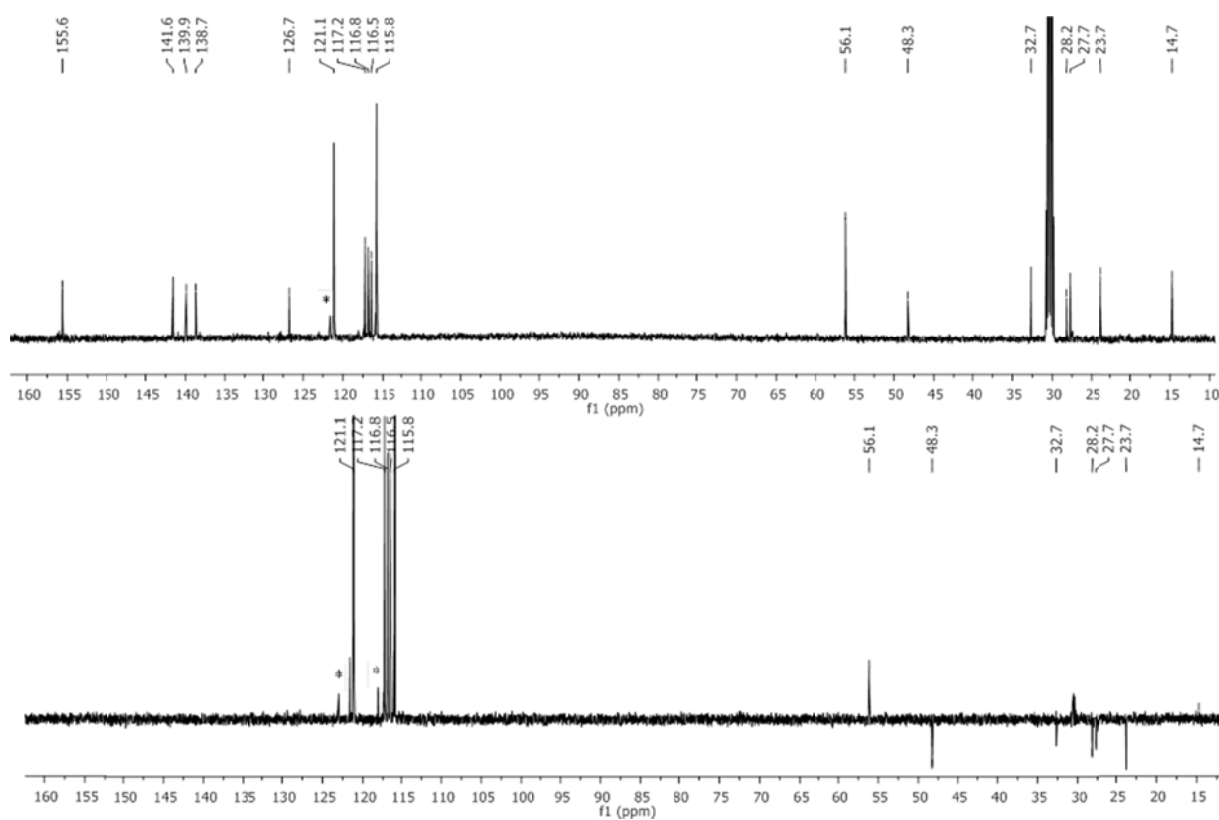

$^{13}\text{C}$  and  $^{13}\text{C}$ -DEPT 135 NMR (75 MHz) of **3c** (20 mg) in acetone- $\text{d}_6$  at 298 K.



1.4  $N^1, N^1'$ -(10-Hexyl-10*H*-phenothiazine-3,7-diyl)bis( $N^4, N^4'$ -dimethylbenzene-1,4-diamine) (**3d**)

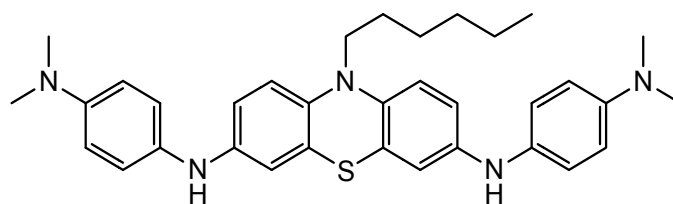

$C_{34}H_{41}N_5S$   
551.79

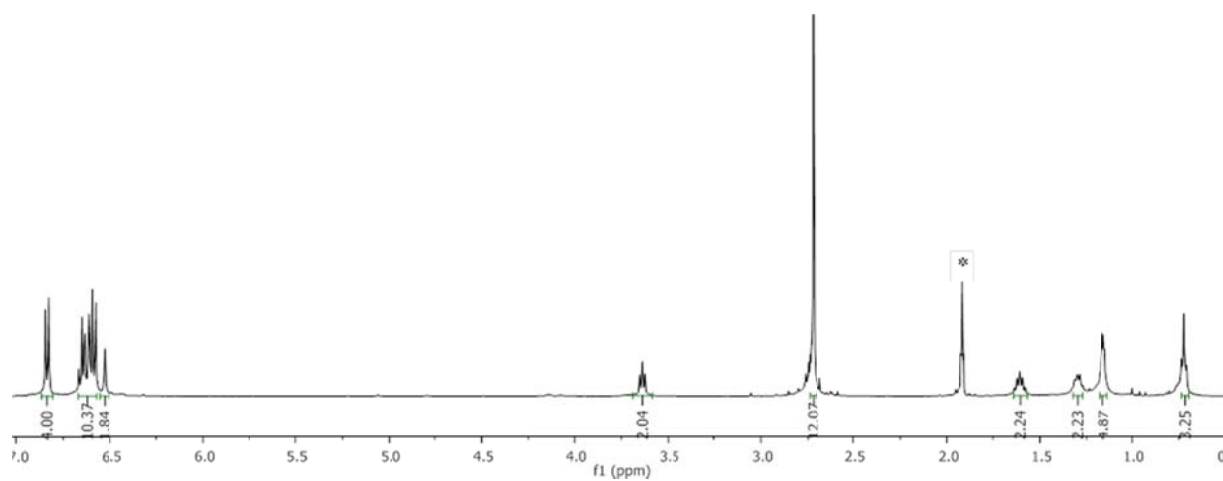

$^1H$  NMR (300 MHz) of **3d** (20 mg) in acetone- $d_6$  at 298 K.

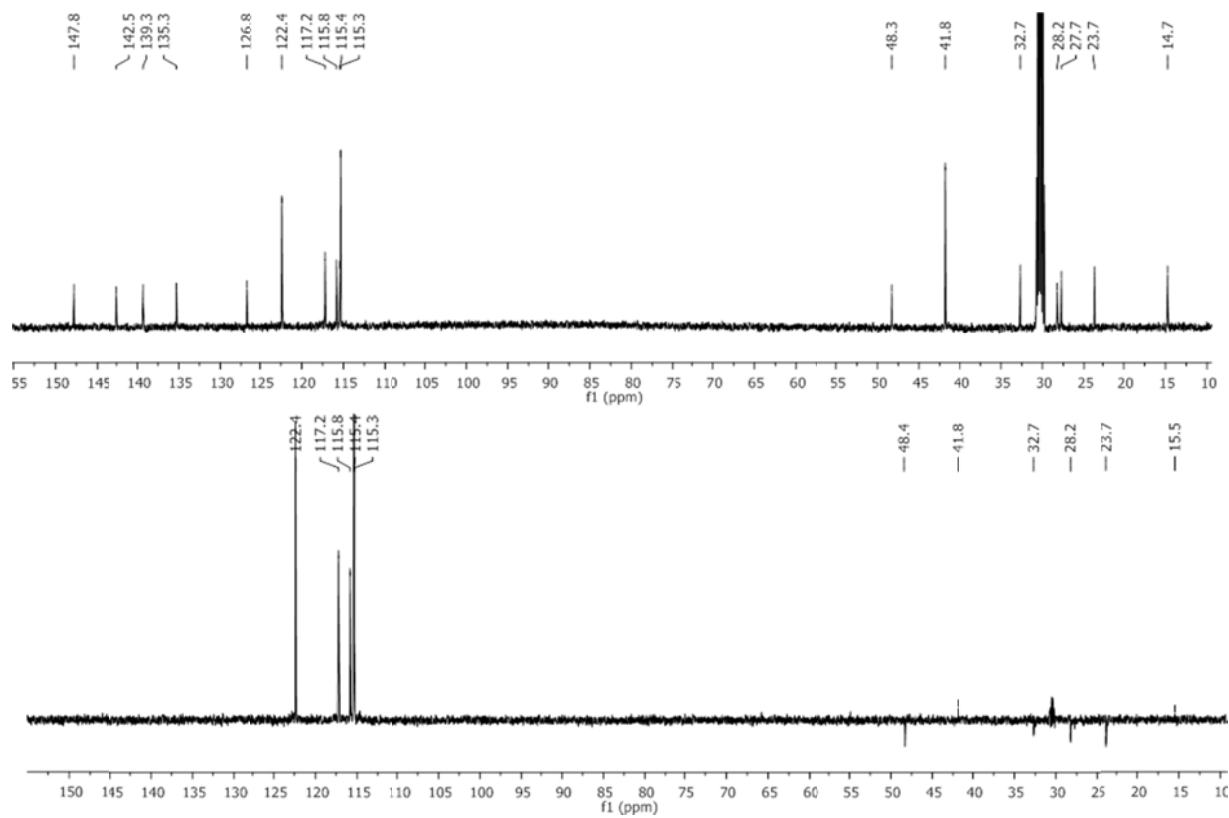

$^{13}\text{C}$  and  $^{13}\text{C}$ -DEPT 135 NMR (75 MHz) of **3d** (20 mg) in acetone- $d_6$  at 298 K.

### 1.5 10-Hexyl-*N*<sup>3</sup>,*N*<sup>7</sup>-dimethyl-*N*<sup>3</sup>,*N*<sup>7</sup>-diphenyl-10*H*-phenothiazine-3,7-diamine (**3e**)

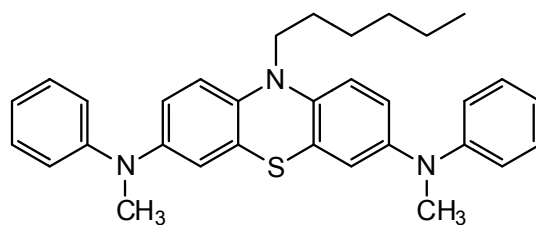

C<sub>32</sub>H<sub>35</sub>N<sub>3</sub>S  
493.71

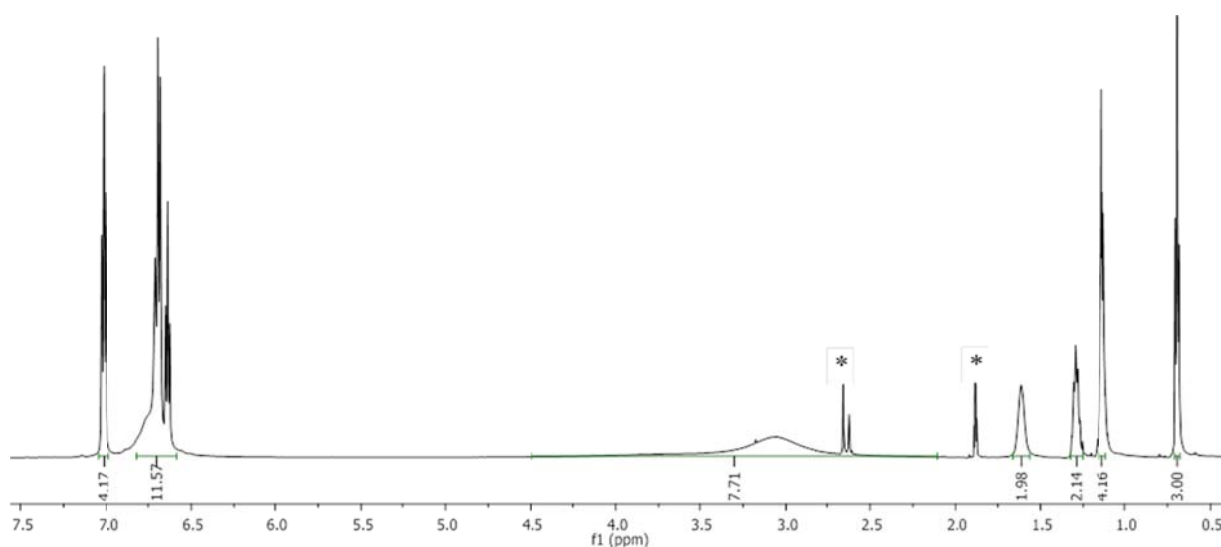

<sup>1</sup>H NMR (300 MHz) of **3e** (20 mg) in acetone-d<sub>6</sub> at 298 K.

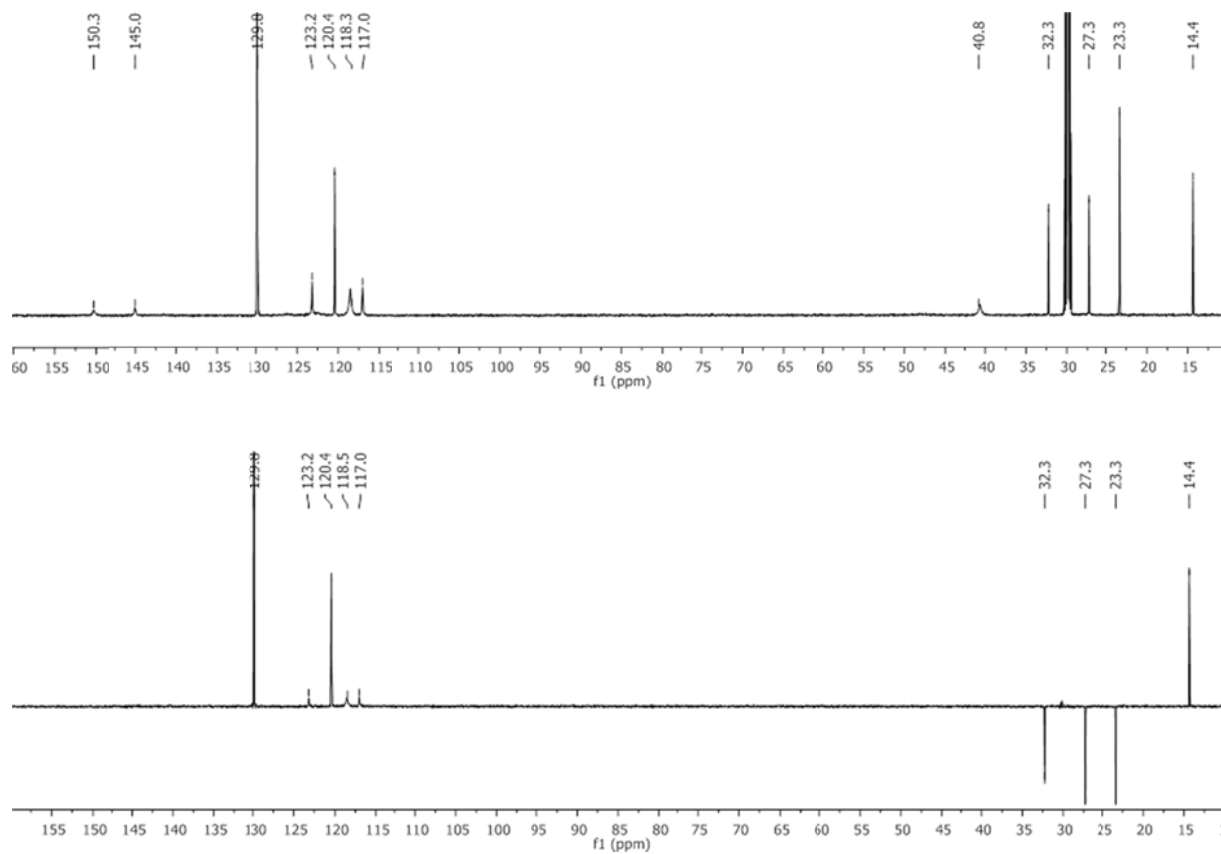

$^{13}\text{C}$  and  $^{13}\text{C}$ -DEPT 135 NMR (75 MHz) of **3e** (20 mg) in acetone- $\text{d}_6$  at 298 K.

**1.6 10-Hexyl-*N*<sup>3</sup>,*N*<sup>7</sup>-bis(4-methoxyphenyl)-*N*<sup>3</sup>,*N*<sup>7</sup>-dimethyl-10*H*-phenothiazine-3,7-diamine (**3f**)**

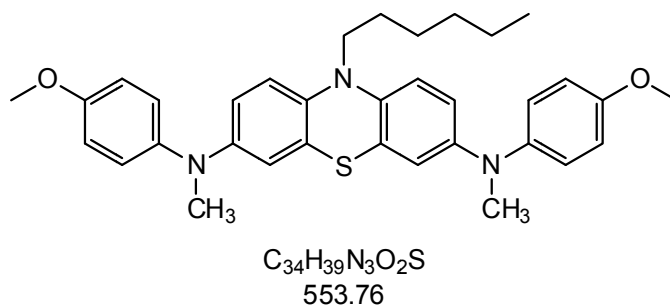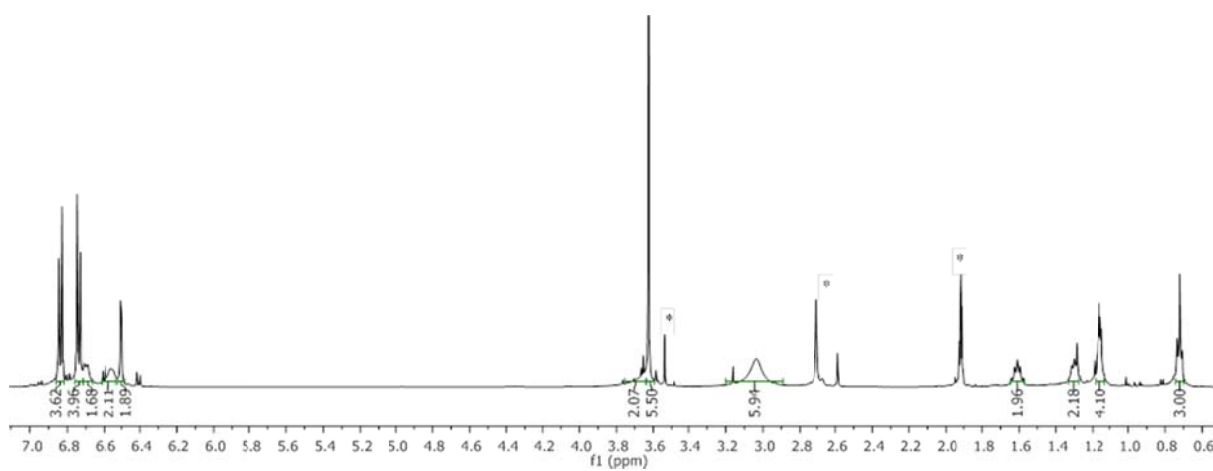

<sup>1</sup>H NMR (300 MHz) of **3f** (20 mg) in acetone-*d*<sub>6</sub> at 298 K.

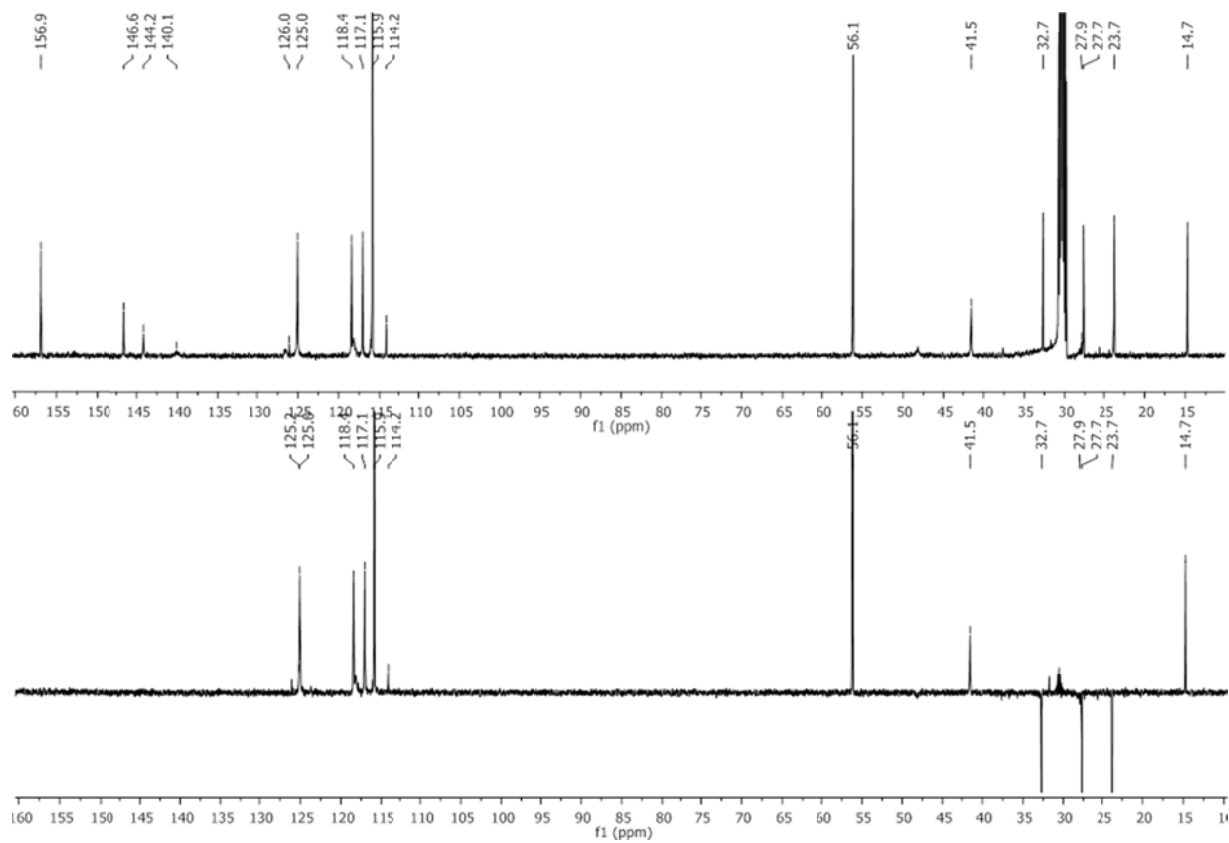

$^{13}\text{C}$  and  $^{13}\text{C}$ -DEPT 135 NMR (75 MHz) of **3f** (20 mg) in acetone- $\text{d}_6$  at 298 K.

1.7 3,7-Di(9*H*-carbazol-9-yl)-10-hexyl-10*H*-phenothiazine (**3g**)

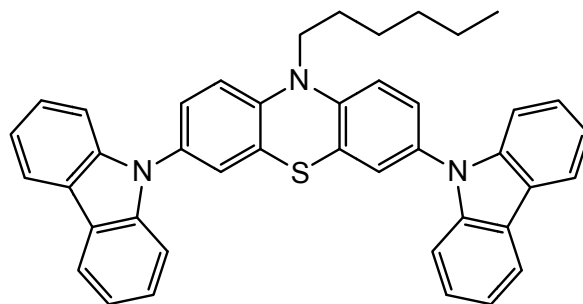

$C_{42}H_{35}N_3S$   
613.81

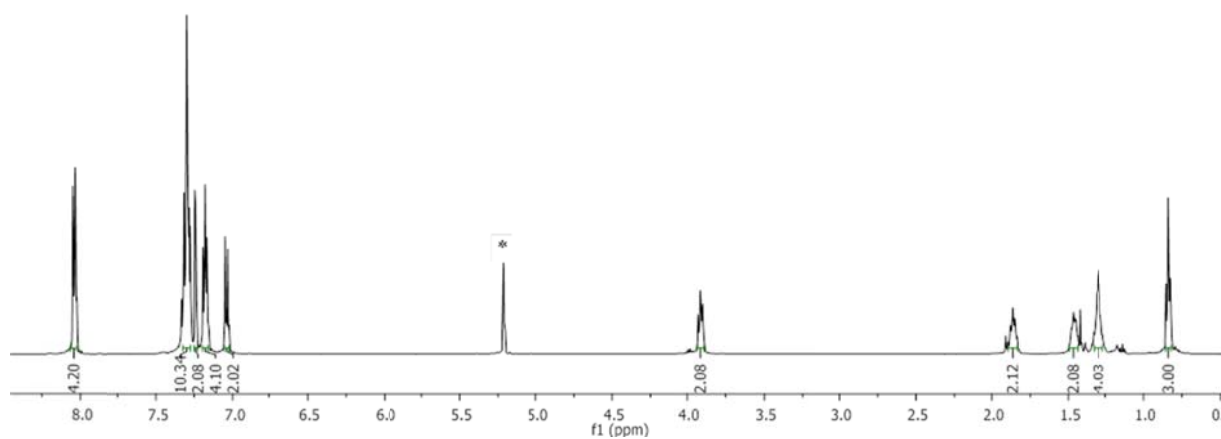

$^1H$  NMR (300 MHz) of **3g** (20 mg) in  $CD_2Cl_2$  at 298 K.

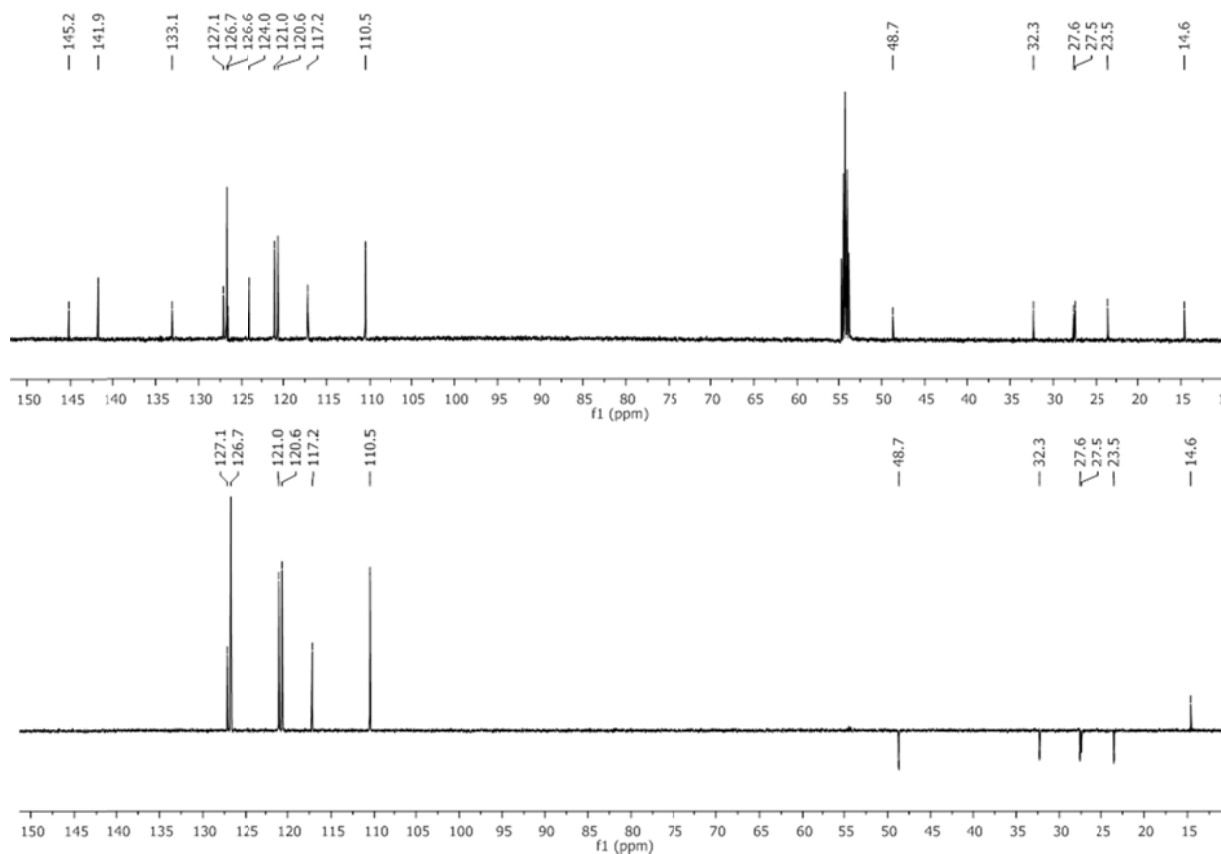

$^{13}\text{C}$  and  $^{13}\text{C}$ -DEPT 135 NMR (75 MHz) of **3g** (20 mg) in  $\text{CD}_2\text{Cl}_2$  at 298 K.



### 1.8 10-Hexyl-*N*<sup>3</sup>,*N*<sup>3</sup>,*N*<sup>7</sup>,*N*<sup>7</sup>-tetraphenyl-10*H*-phenothiazine-3,7-diamine (**3h**)

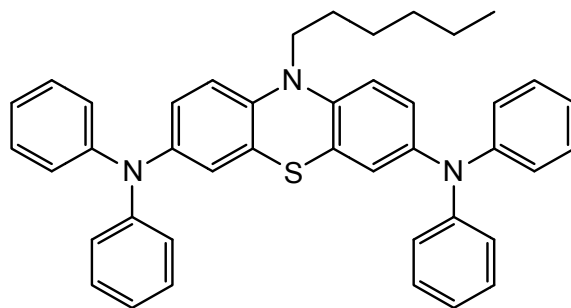

$C_{42}H_{39}N_3S$   
617.84

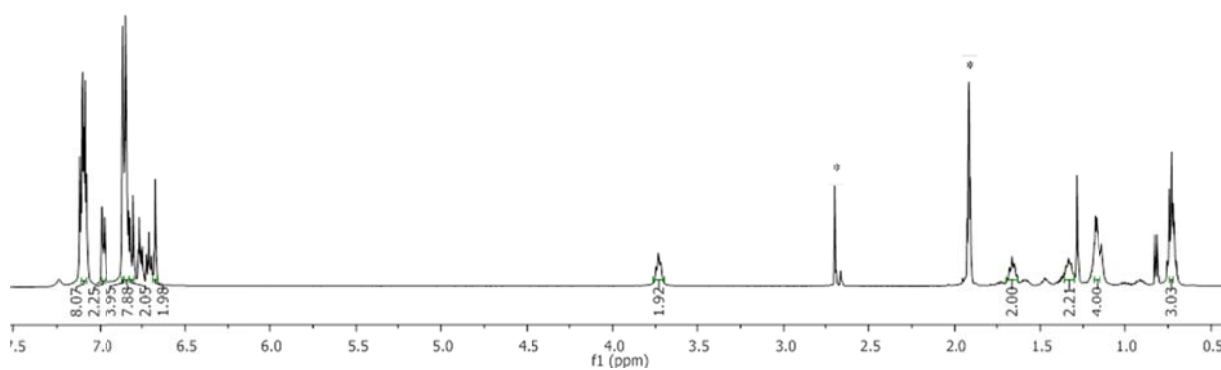

<sup>1</sup>H NMR (300 MHz) of **3h** (20 mg) in acetone-*d*<sub>6</sub> at 298 K.

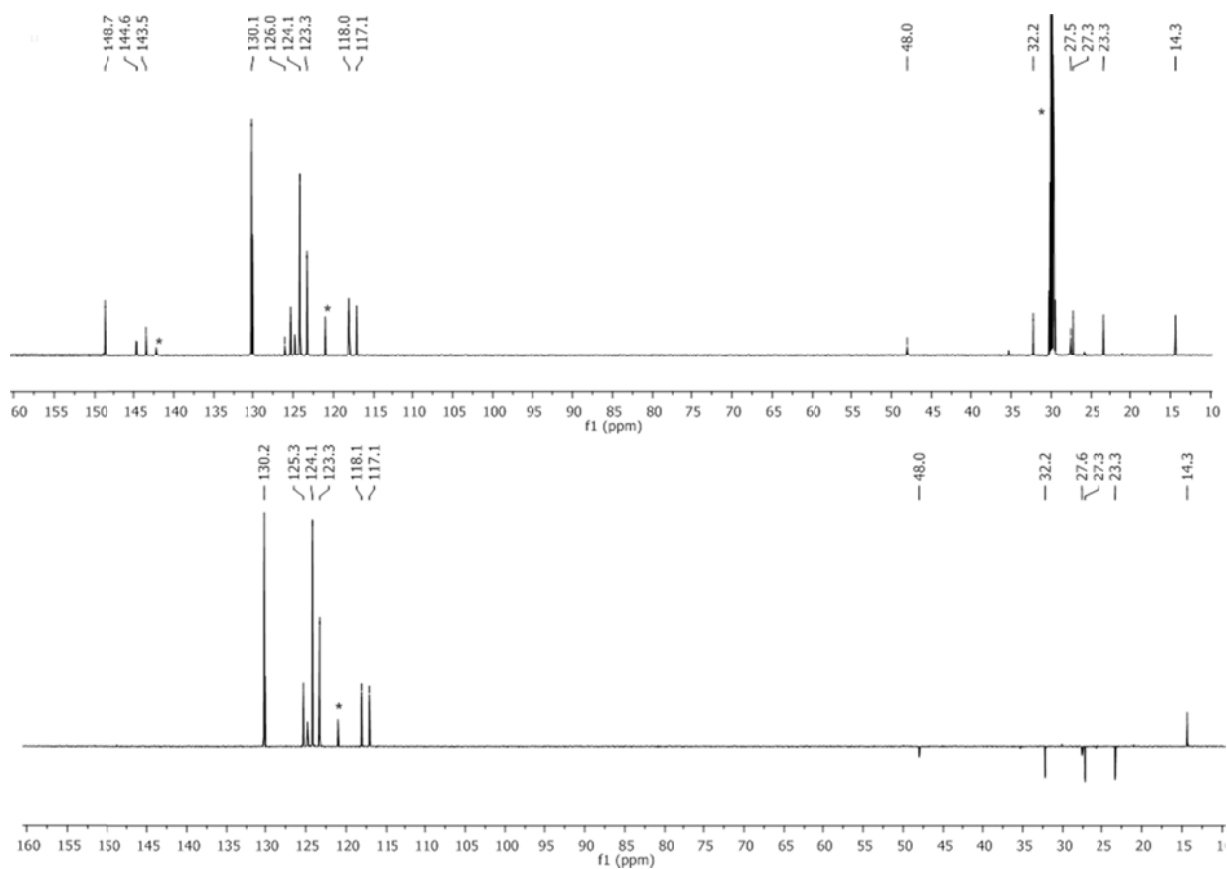

$^{13}\text{C}$  and  $^{13}\text{C}$ -DEPT 135 NMR (75 MHz) of **3h** (20 mg) in acetone- $\text{d}_6$  at 298 K.

**1.9 10-Hexyl-*N*<sup>3</sup>,*N*<sup>3</sup>,*N*<sup>7</sup>,*N*<sup>7</sup>-tetrakis(4-methoxyphenyl)-10*H*-phenothiazine-3,7-diamine (**3i**)**

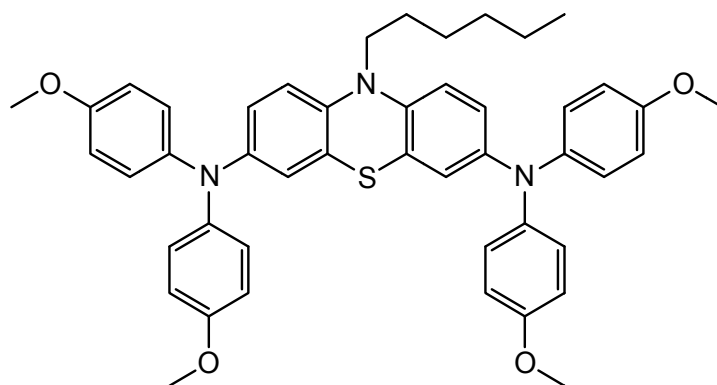

C<sub>46</sub>H<sub>47</sub>N<sub>3</sub>O<sub>4</sub>S  
737.95

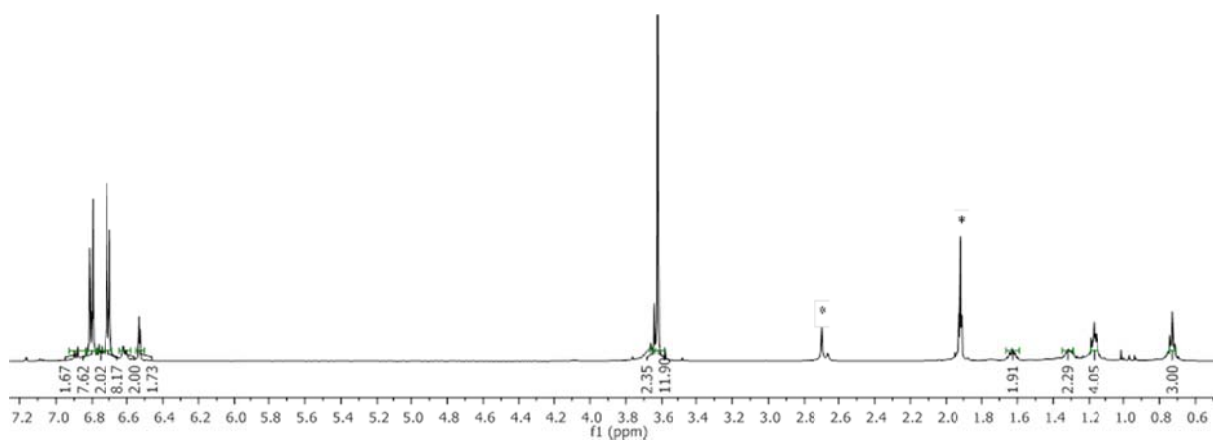

<sup>1</sup>H NMR (300 MHz) of **3i** (20 mg) in acetone-d<sub>6</sub> at 298 K.

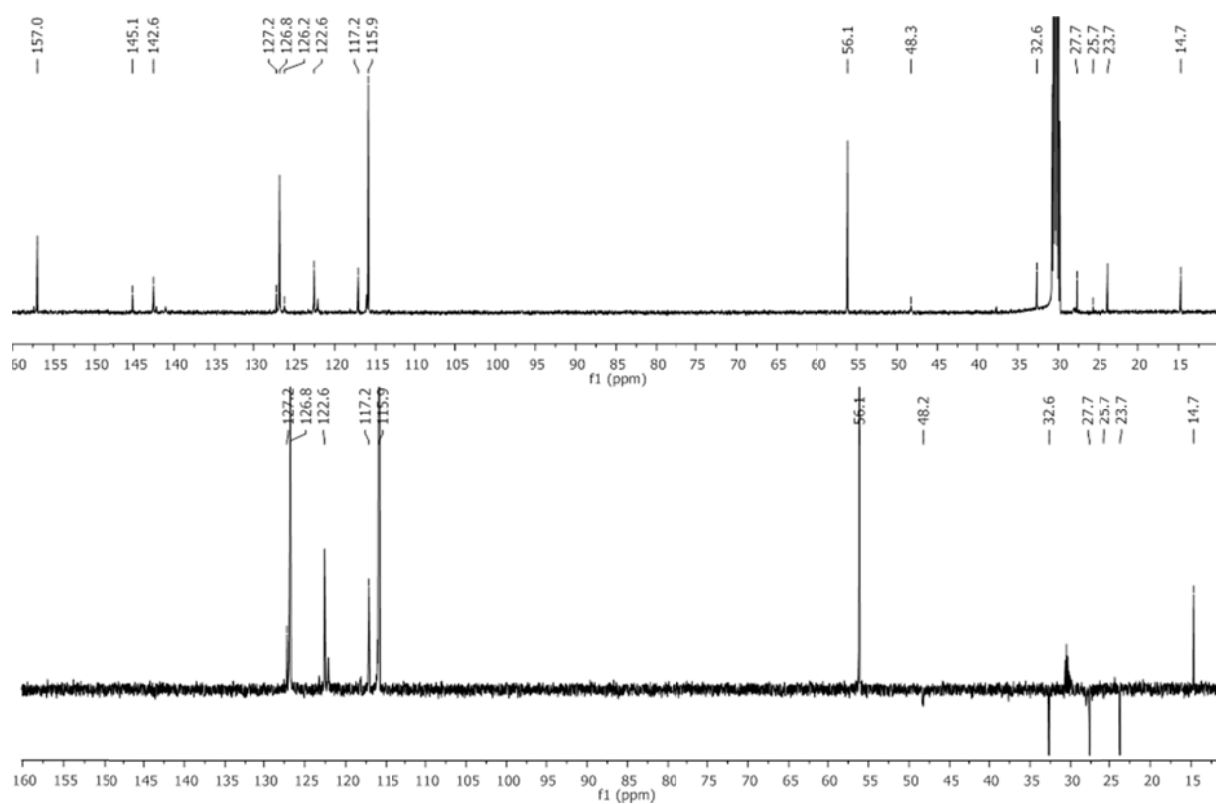

$^{13}\text{C}$  and  $^{13}\text{C}$ -DEPT 135 NMR (75 MHz) of **3i** (20 mg) in acetone- $\text{d}_6$  at 298 K.

1.10 *N*<sup>3</sup>,*N*<sup>3</sup>,*N*<sup>7</sup>,*N*<sup>7</sup>-tetraethyl-10-hexyl-10*H*-phenothiazine-3,7-diamine (**3j**)

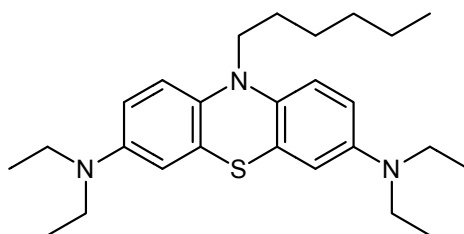

C<sub>26</sub>H<sub>39</sub>N<sub>3</sub>S  
425.67

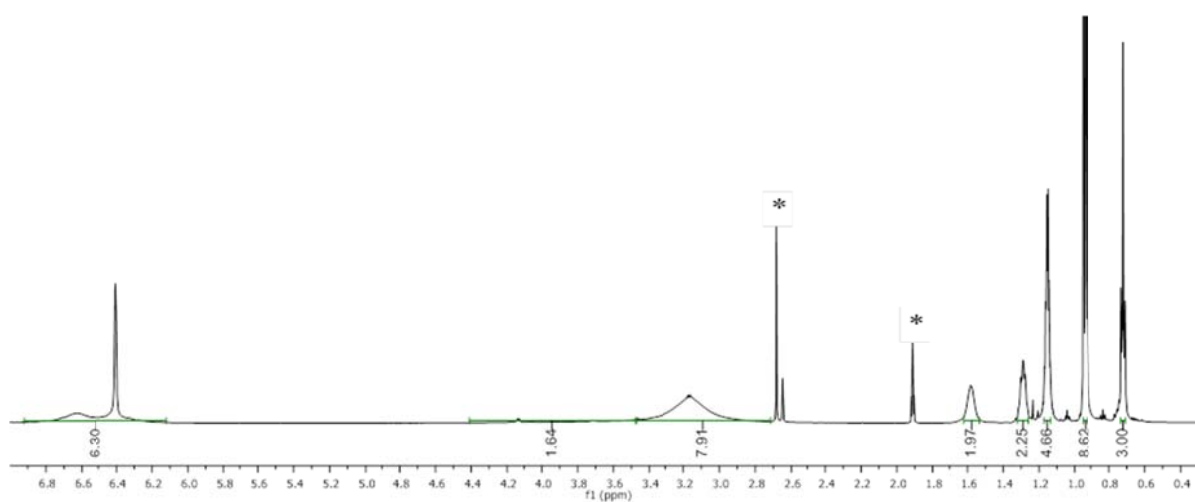

<sup>1</sup>H NMR (300 MHz) of **3j** (20 mg) in acetone-d<sub>6</sub> at 298 K.

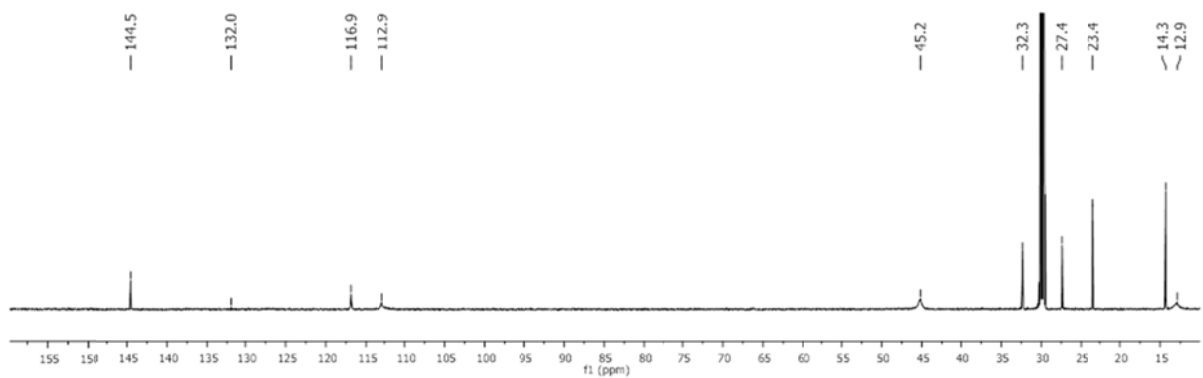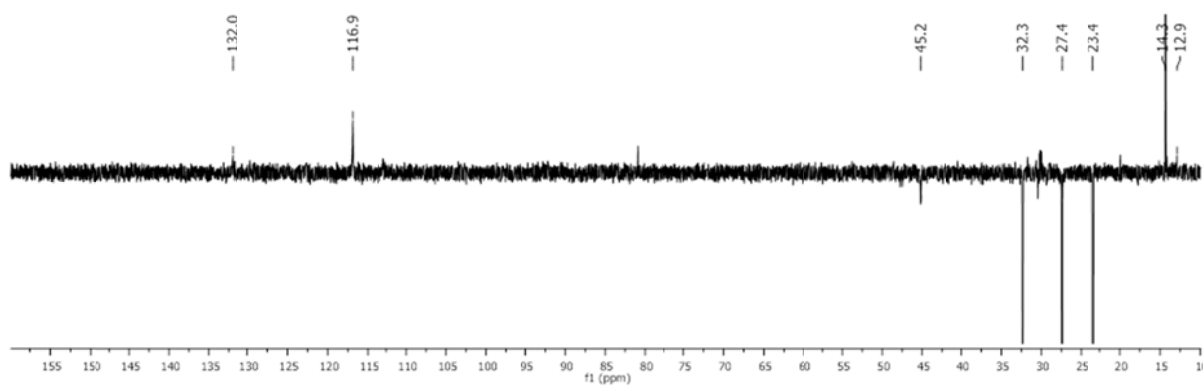

$^{13}\text{C}$  and  $^{13}\text{C}$ -DEPT 135 NMR (75 MHz) of **3j** (20 mg) in acetone- $\text{d}_6$  at 298 K.

### 1.11 10-Hexyl-3,7-di(piperidin-1-yl)-10H-phenothiazine (3k)

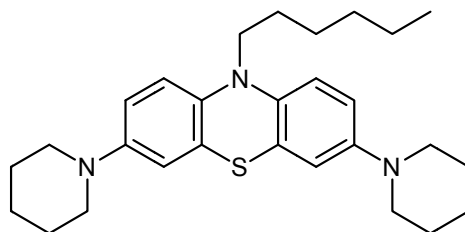

$C_{28}H_{39}N_3S$   
449.69

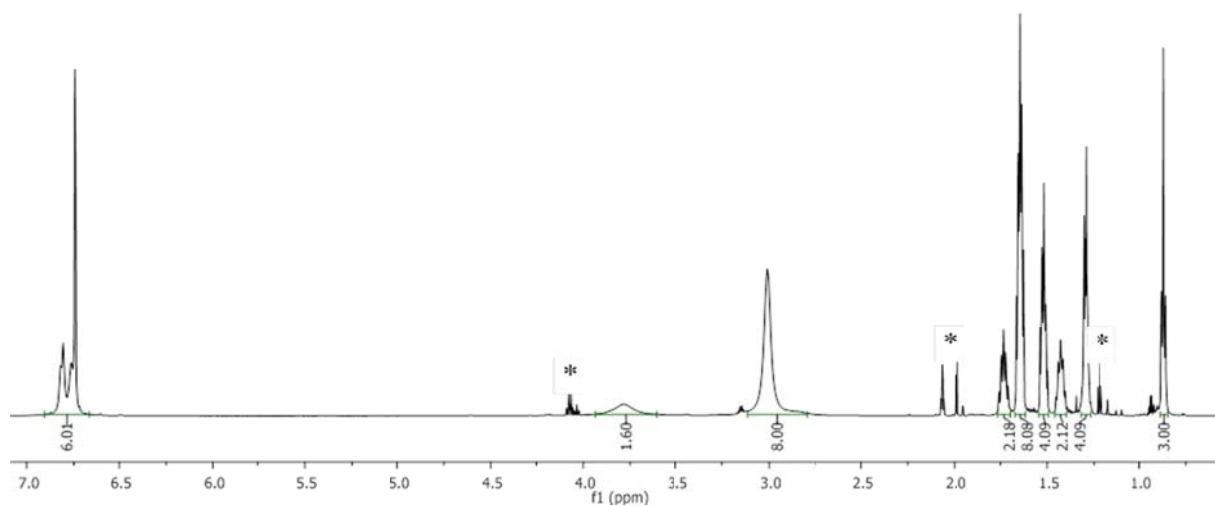

$^1H$  NMR (300 MHz) of **3k** (20 mg) in acetone- $d_6$  at 298 K.

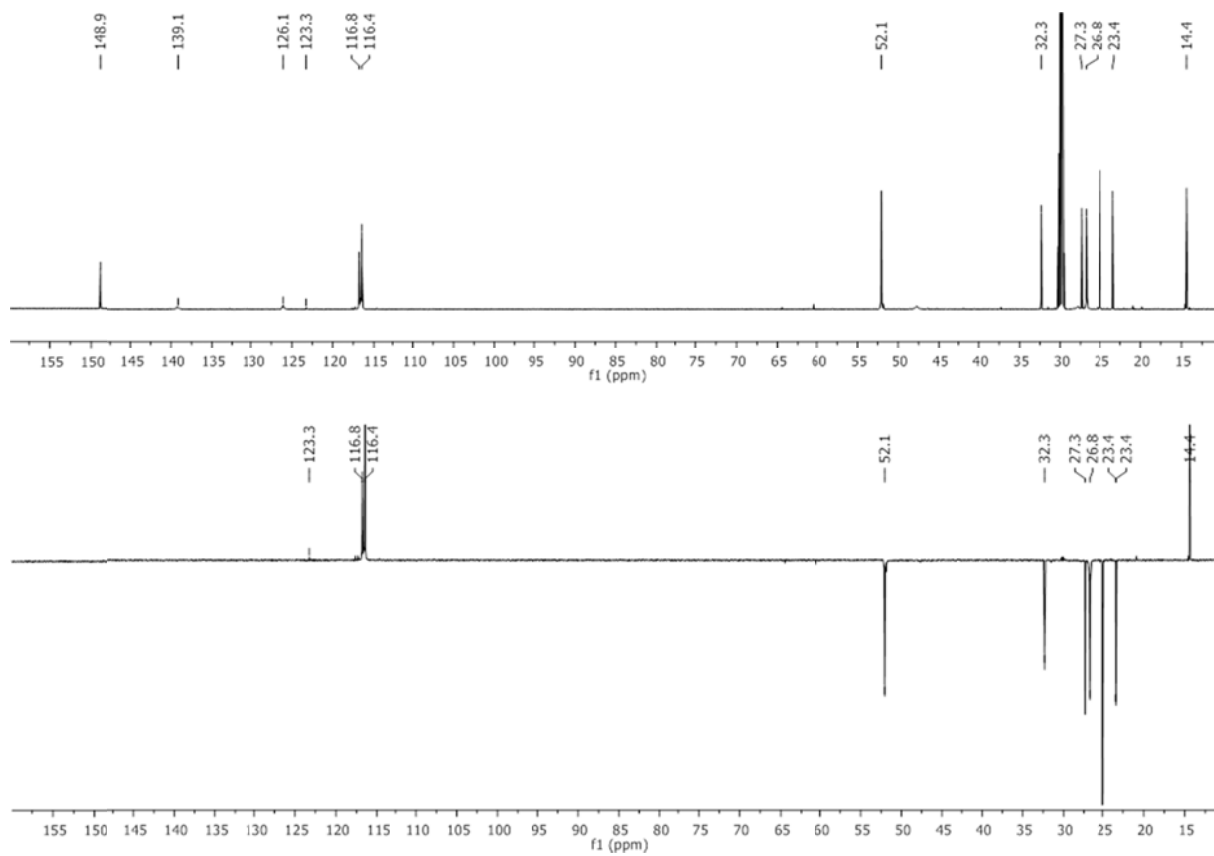

$^{13}\text{C}$  and  $^{13}\text{C}$ -DEPT 135 NMR (75 MHz) of **3k** (20 mg) in acetone- $\text{d}_6$  at 298 K.



### 1.12 10-Hexyl-3,7-di(pyrrolidin-1-yl)-10H-phenothiazine (3I)

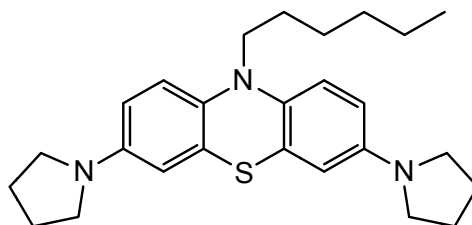

$C_{26}H_{35}N_3S$   
421.64

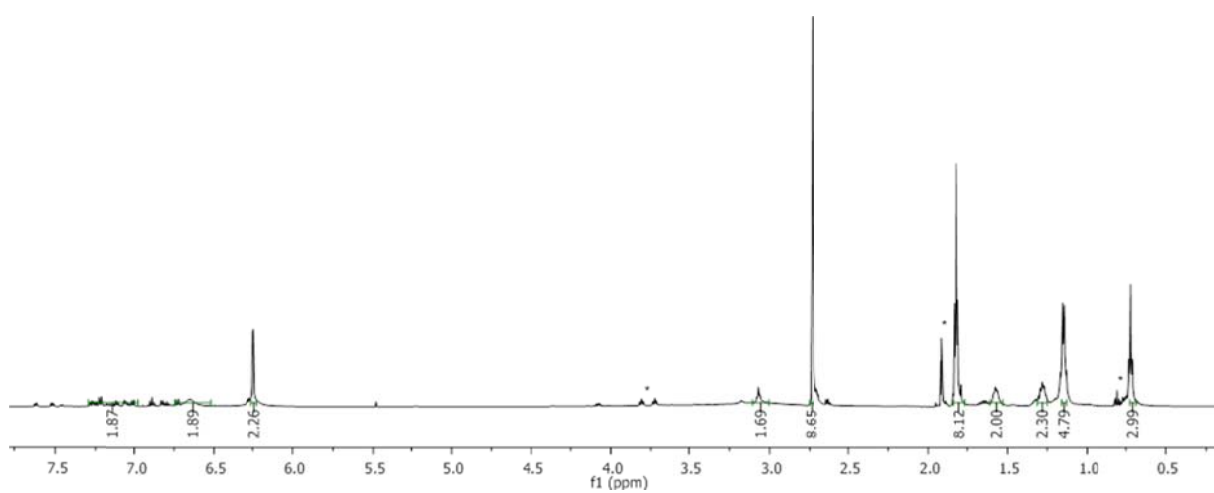

$^1H$  NMR (300 MHz) of **3I** (20 mg) in acetone- $d_6$  at 298 K.

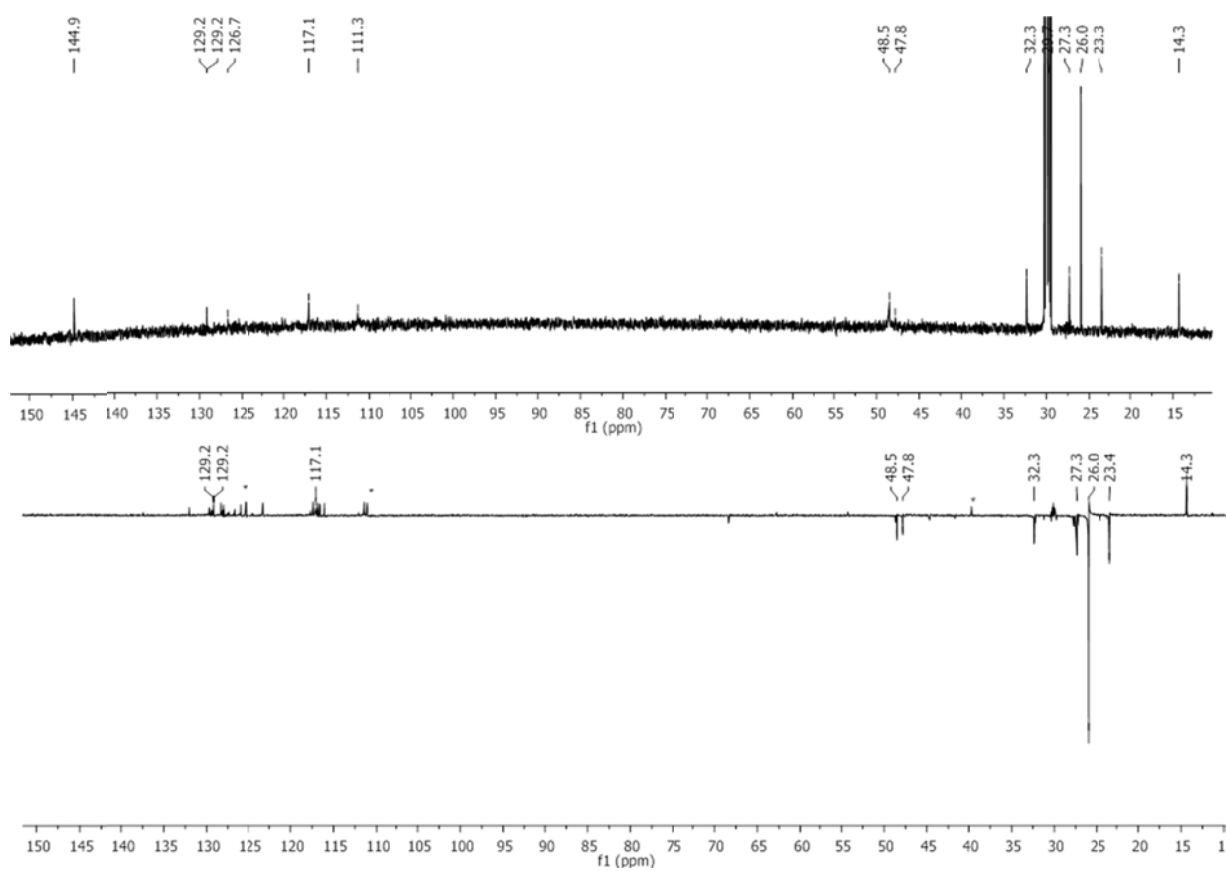

$^{13}\text{C}$  and  $^{13}\text{C}$ -DEPT 135 NMR (75 MHz) of **3I** (20 mg) in acetone- $d_6$  at 298 K.

## 2 UV/Vis and emission spectra of 3,7-dianilino substituted *N*-hexyl phenothiazines 3a-3l

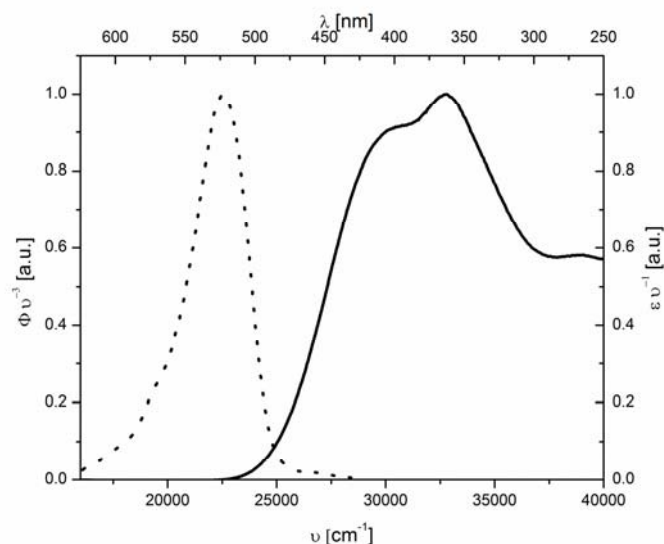

**Figure 1:** Normalized (arbitrary units) absorption (solid line) and emission spectra (dotted line) of Dimethyl 4,4'-((10-hexyl-10*H*-phenothiazine-3,7-diyl)bis-(azanediyl))dibenzoate **3a** (recorded in  $\text{CH}_2\text{Cl}_2$ :  $T = 293$  K,  $\lambda_{\text{exc}}$  = longest wavelength  $\lambda_{\text{max}}$ ).

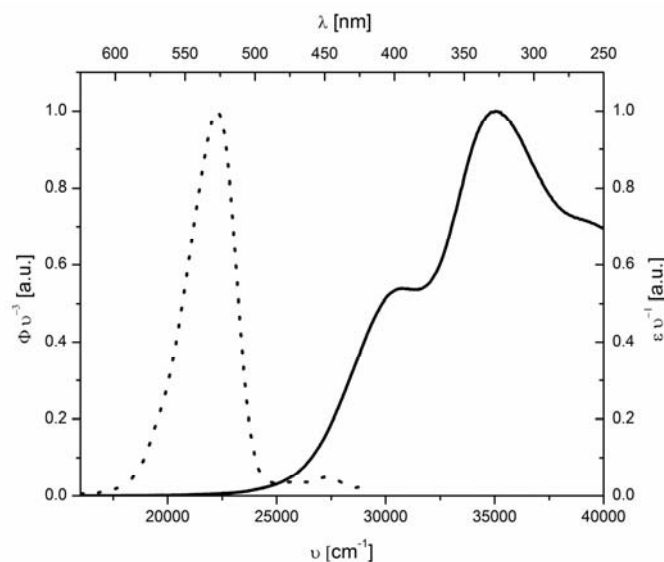

**Figure 2:** Normalized (arbitrary units) absorption (solid line) and emission spectra (dotted line) of  $N^3, N^7$ -Bis(4-(*tert*-butyl)phenyl)-10-hexyl-10*H*-phenothiazine-3,7-diamine **3b** (recorded in  $\text{CH}_2\text{Cl}_2$ :  $T = 293$  K,  $\lambda_{\text{exc}}$  = longest wavelength  $\lambda_{\text{max}}$ ).

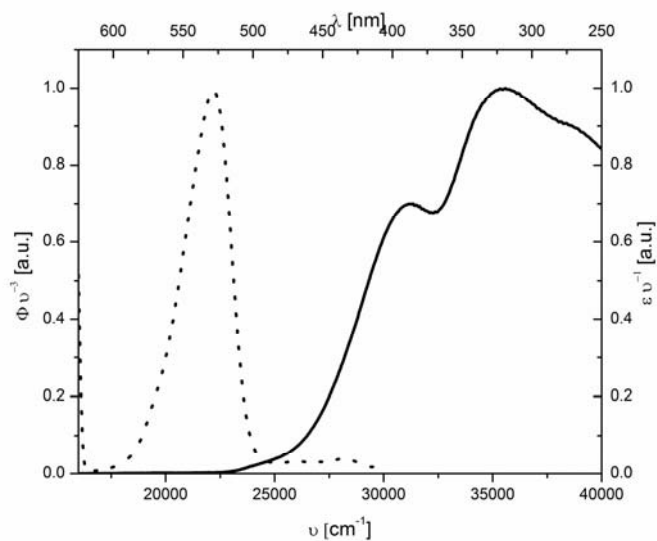

**Figure 3:** Normalized (arbitrary units) absorption (solid line) and emission spectra (dotted line) of 10-Hexyl- $N^3, N^7$ -bis(4-methoxyphenyl)-10*H*-phenothiazine-3,7-diamine **3c** (recorded in  $\text{CH}_2\text{Cl}_2$ :  $T = 293$  K,  $\lambda_{exc}$  = longest wavelength  $\lambda_{max}$ ).

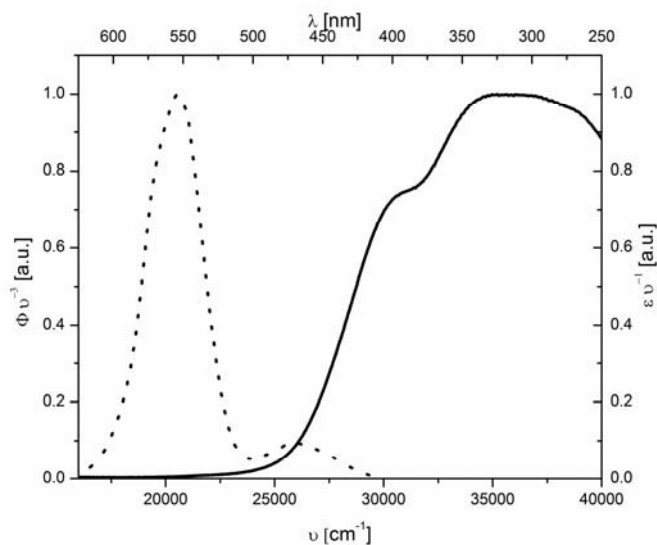

**Figure 4:** Normalized (arbitrary units) absorption (solid line) and emission spectra (dotted line) of  $N^1, N^{1'}$ -(10-Hexyl-10*H*-phenothiazine-3,7-diyl)bis( $N^4, N^{4'}$ -dimethylbenzene-1,4-diamine) **3d** (recorded in  $\text{CH}_2\text{Cl}_2$ :  $T = 293$  K,  $\lambda_{exc}$  = longest wavelength  $\lambda_{max}$ ).

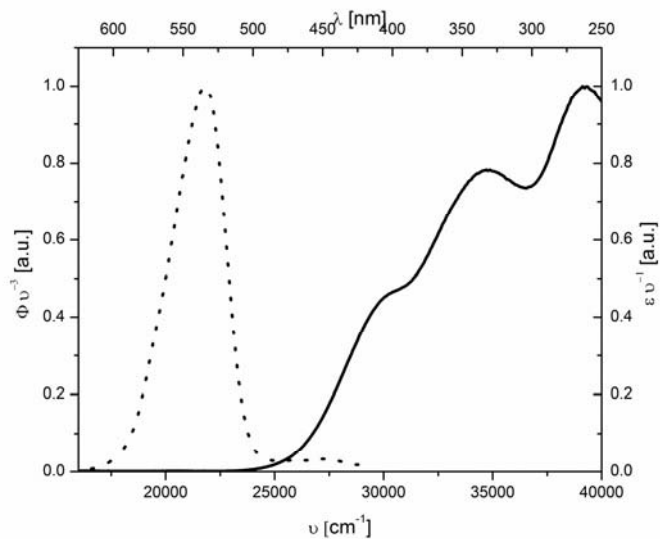

**Figure 5:** Normalized (arbitrary units) absorption (solid line) and emission spectra (dotted line) of 10-Hexyl- $N^3,N^7$ -dimethyl- $N^3,N^7$ -diphenyl-10H-phenothiazine-3,7-diamine **3e** (recorded in  $\text{CH}_2\text{Cl}_2$ :  $T = 293$  K,  $\lambda_{exc}$  = longest wavelength  $\lambda_{max}$ ).

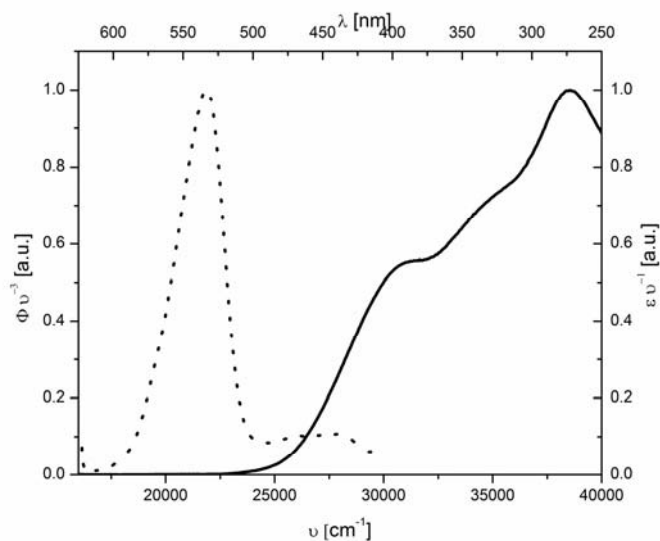

**Figure 6:** Normalized (arbitrary units) absorption (solid line) and emission spectra (dotted line) of 10-Hexyl- $N^3,N^7$ -bis(4-methoxyphenyl)- $N^3,N^7$ -dimethyl-10H-phenothiazine-3,7-diamine **3f** (recorded in  $\text{CH}_2\text{Cl}_2$ :  $T = 293$  K,  $\lambda_{exc}$  = longest wavelength  $\lambda_{max}$ ).

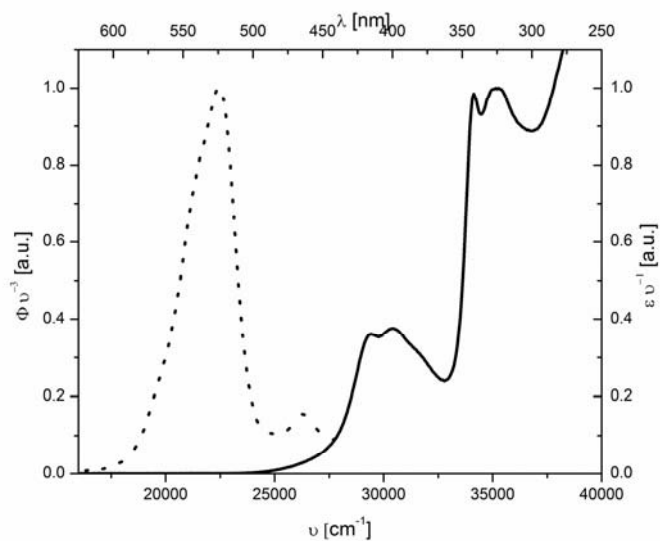

**Figure 7:** Normalized (arbitrary units) absorption (solid line) and emission spectra (dotted line) of 3,7-Di(9H-carbazol-9-yl)-10-hexyl-10H-phenothiazine **3g** (recorded in  $\text{CH}_2\text{Cl}_2$ :  $T = 293$  K,  $\lambda_{exc}$  = longest wavelength  $\lambda_{max}$ ).

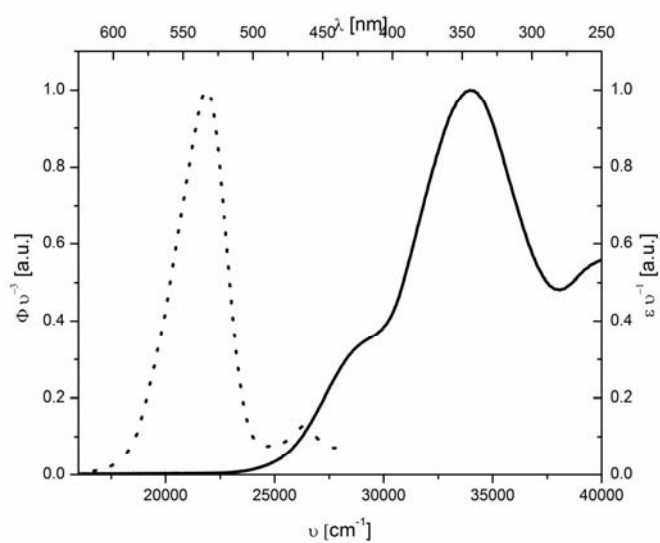

**Figure 8:** Normalized (arbitrary units) absorption (solid line) and emission spectra (dotted line) of 10-Hexyl- $N^3,N^3,N^7,N^7$ -tetraphenyl-10H-phenothiazine-3,7-diamine **3h** (recorded in  $\text{CH}_2\text{Cl}_2$ :  $T = 293$  K,  $\lambda_{exc}$  = longest wavelength  $\lambda_{max}$ ).

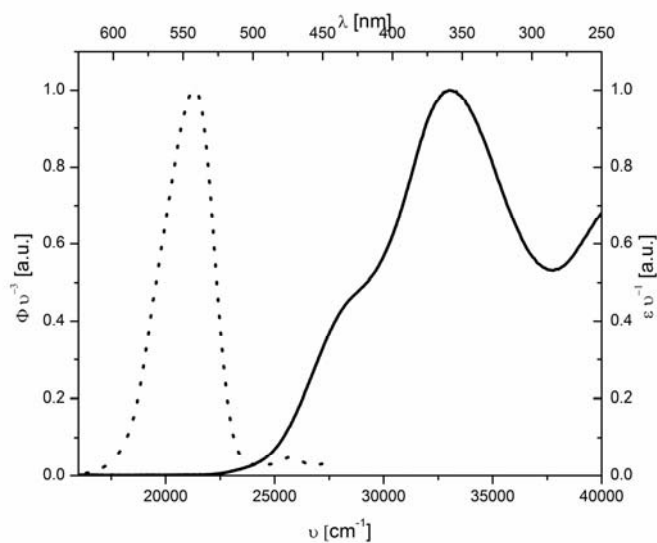

**Figure 9:** Normalized (arbitrary units) absorption (solid line) and emission spectra (dotted line) of 10-Hexyl- $N^3, N^3, N^7, N^7$ -tetrakis(4-methoxyphenyl)-10H-phenothiazine-3,7-diamine **3i** (recorded in  $\text{CH}_2\text{Cl}_2$ :  $T = 293$  K,  $\lambda_{exc}$  = longest wavelength  $\lambda_{max}$ ).

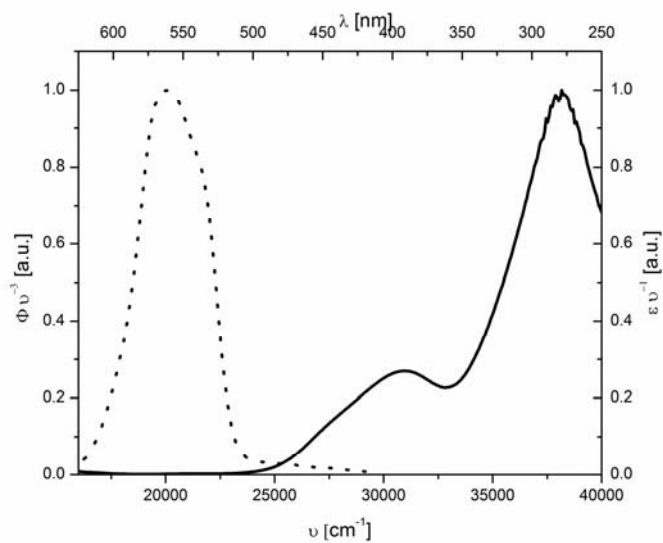

**Figure 10:** Normalized (arbitrary units) absorption (solid line) and emission spectra (dotted line) of  $N^3, N^3, N^7, N^7$ -tetraethyl-10-hexyl-10H-phenothiazine-3,7-diamine **3j** (recorded in  $\text{CH}_2\text{Cl}_2$ :  $T = 293$  K,  $\lambda_{exc}$  = longest wavelength  $\lambda_{max}$ ).

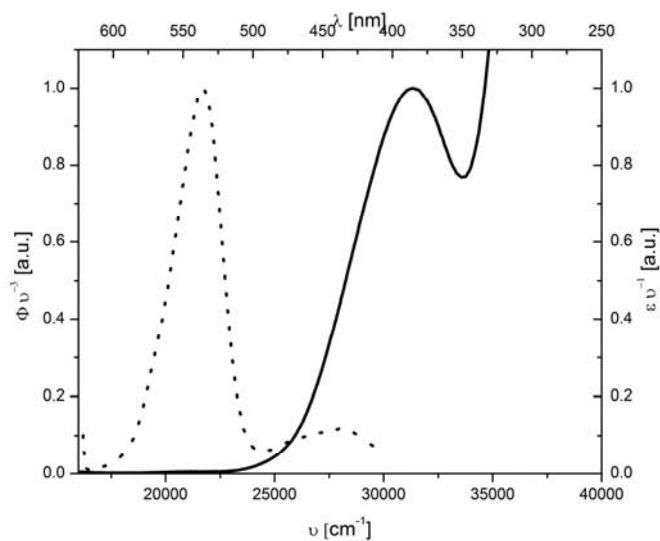

**Figure 11:** Normalized (arbitrary units) absorption (solid line) and emission spectra (dotted line) of 10-Hexyl-3,7-di(piperidin-1-yl)-10H-phenothiazine **3k** (recorded in  $\text{CH}_2\text{Cl}_2$ ;  $T = 293$  K,  $\lambda_{exc}$  = longest wavelength  $\lambda_{max}$ ).

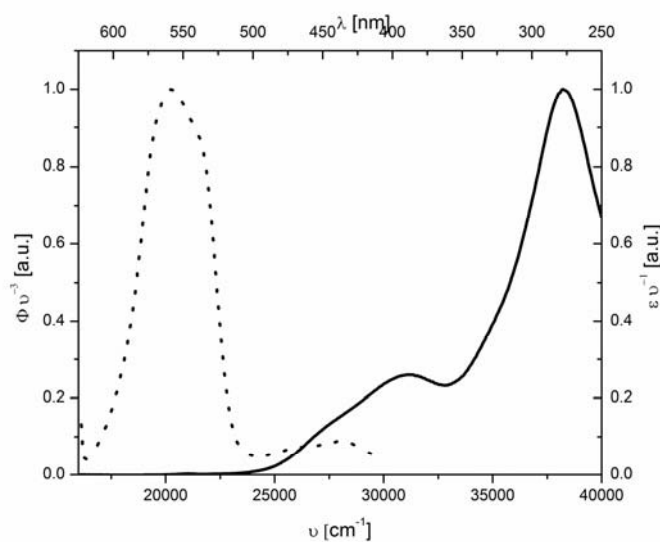

**Figure 12:** Normalized (arbitrary units) absorption (solid line) and emission spectra (dotted line) of 10-Hexyl-3,7-di(pyrrolidin-1-yl)-10H-phenothiazine **3l** (recorded in  $\text{CH}_2\text{Cl}_2$ ;  $T = 293$  K,  $\lambda_{exc}$  = longest wavelength  $\lambda_{max}$ ).



### 3 Cyclic voltammograms of 3,7-dianilino substituted *N*-hexyl phenothiazines 3a-3l

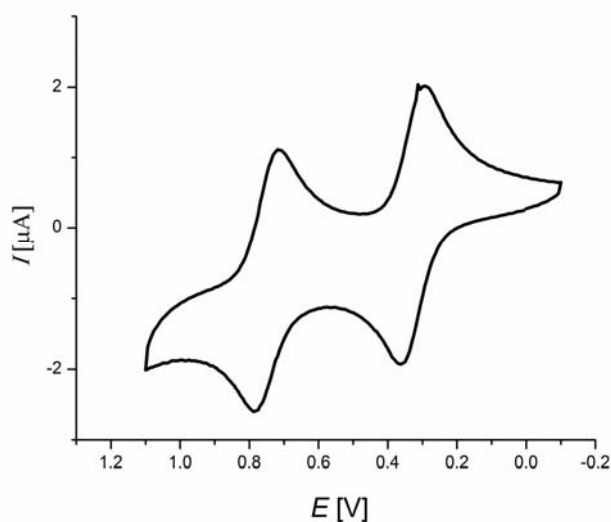

**Figure 13:** Cyclic voltammogram of Dimethyl 4,4'-((10-hexyl-10*H*-phenothiazine-3,7-diyl)bis-(azanediyl))dibenzoate **3a** (recorded in CH<sub>2</sub>Cl<sub>2</sub> at *T* = 293 K, 0.1 M electrolyte [Bu<sub>4</sub>N][PF<sub>6</sub>], *v* = 100 mV/s, Pt working electrode, Ag/AgCl reference and Pt counter electrode).

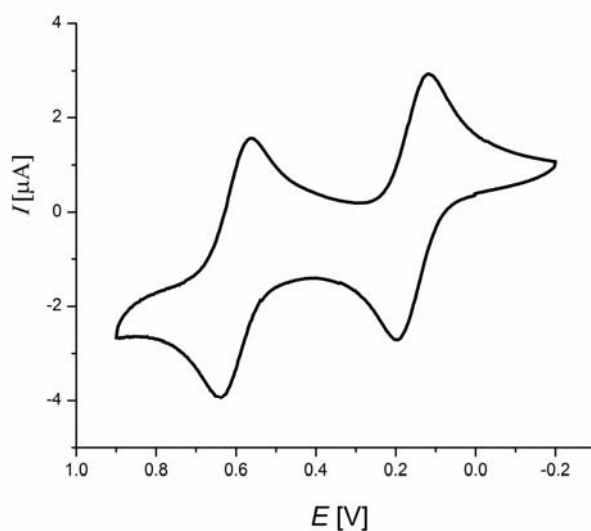

**Figure 14:** Cyclic voltammogram of *N*<sup>3</sup>,*N*<sup>7</sup>-Bis(4-(*tert*-butyl)phenyl)-10-hexyl-10*H*-phenothiazine-3,7-diamine **3b** (recorded in CH<sub>2</sub>Cl<sub>2</sub> at *T* = 293 K, 0.1 M electrolyte [Bu<sub>4</sub>N][PF<sub>6</sub>], *v* = 100 mV/s, Pt working electrode, Ag/AgCl reference and Pt counter electrode).

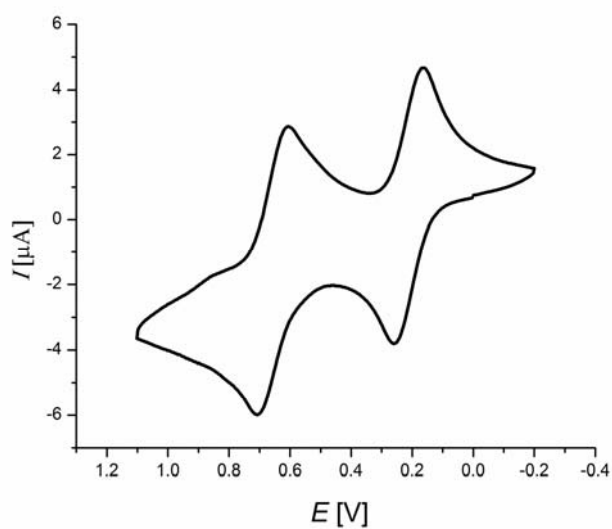

**Figure 15:** Cyclic voltammogram of 10-Hexyl- $N^3,N^7$ -bis(4-methoxyphenyl)-10H-phenothiazine-3,7-diamine **3c** (recorded in  $\text{CH}_2\text{Cl}_2$  at  $T = 293$  K, 0.1 M electrolyte  $[\text{Bu}_4\text{N}][\text{PF}_6]$ ,  $\nu = 100$  mV/s, Pt working electrode, Ag/AgCl reference and Pt counter electrode).

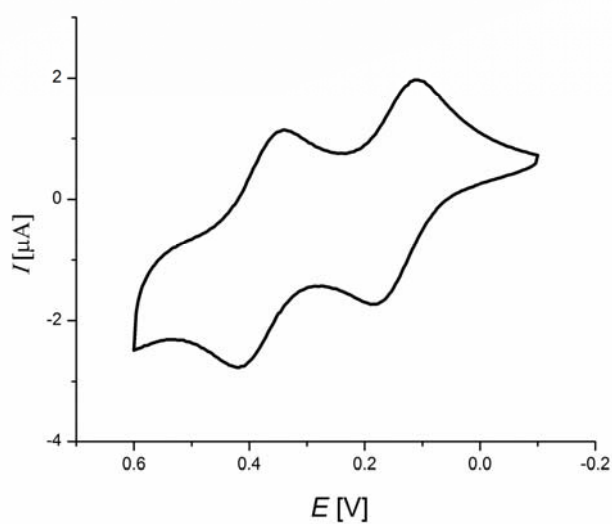

**Figure 16:** Cyclic voltammogram of  $N^1,N^{1'}$ -(10-Hexyl-10H-phenothiazine-3,7-diyl)bis( $N^4,N^{4'}$ -dimethylbenzene-1,4-diamine) **3d** (recorded in  $\text{CH}_2\text{Cl}_2$  at  $T = 293$  K, 0.1 M electrolyte  $[\text{Bu}_4\text{N}][\text{PF}_6]$ ,  $\nu = 100$  mV/s, Pt working electrode, Ag/AgCl reference and Pt counter electrode).

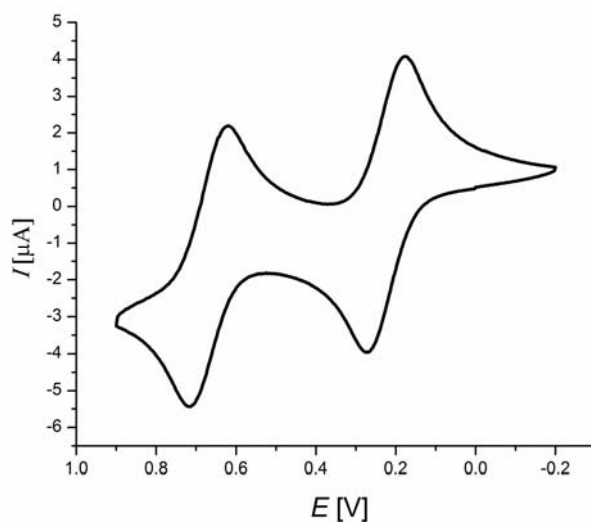

**Figure 17:** Cyclic voltammogram of 10-Hexyl- $N^3,N^7$ -dimethyl- $N^3,N^7$ -diphenyl-10*H*-phenothiazine-3,7-diamine **3e** (recorded in  $\text{CH}_2\text{Cl}_2$  at  $T = 293$  K, 0.1 M electrolyte  $[\text{Bu}_4\text{N}][\text{PF}_6]$ ,  $\nu = 100$  mV/s, Pt working electrode, Ag/AgCl reference and Pt counter electrode).

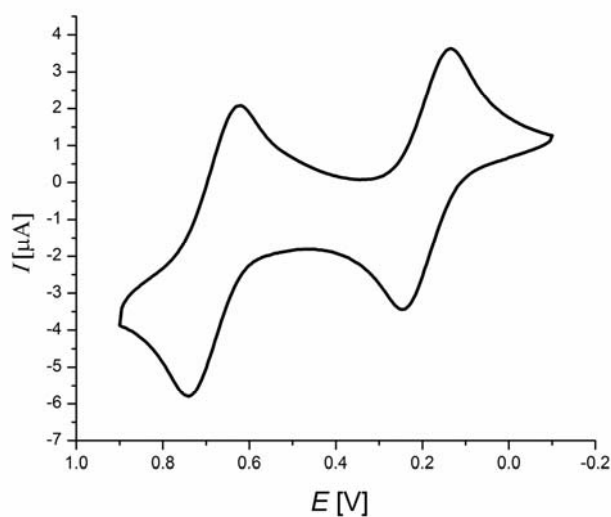

**Figure 18:** Cyclic voltammogram of 10-Hexyl- $N^3,N^7$ -bis(4-methoxyphenyl)- $N^3,N^7$ -dimethyl-10*H*-phenothiazine-3,7-diamine **3f** (recorded in  $\text{CH}_2\text{Cl}_2$  at  $T = 293$  K, 0.1 M electrolyte  $[\text{Bu}_4\text{N}][\text{PF}_6]$ ,  $\nu = 100$  mV/s, Pt working electrode, Ag/AgCl reference and Pt counter electrode).

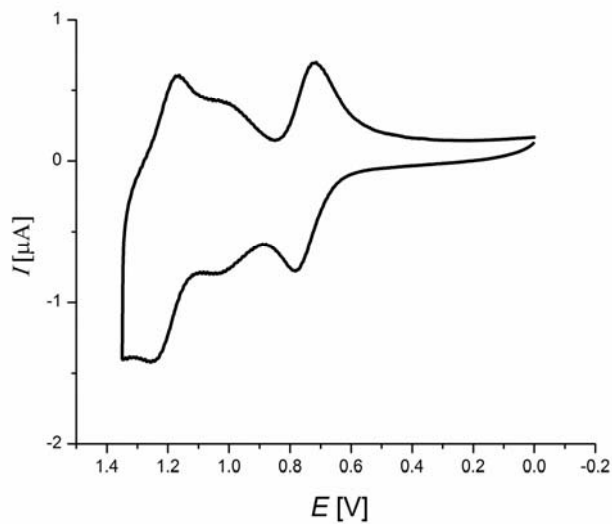

**Figure 19:** Cyclic voltammogram of 3,7-Di(9H-carbazol-9-yl)-10-hexyl-10H-phenothiazine **3g** (recorded in CH<sub>2</sub>Cl<sub>2</sub> at *T* = 293 K, 0.1 M electrolyte [Bu<sub>4</sub>N][PF<sub>6</sub>], *v* = 100 mV/s, Pt working electrode, Ag/AgCl reference and Pt counter electrode).

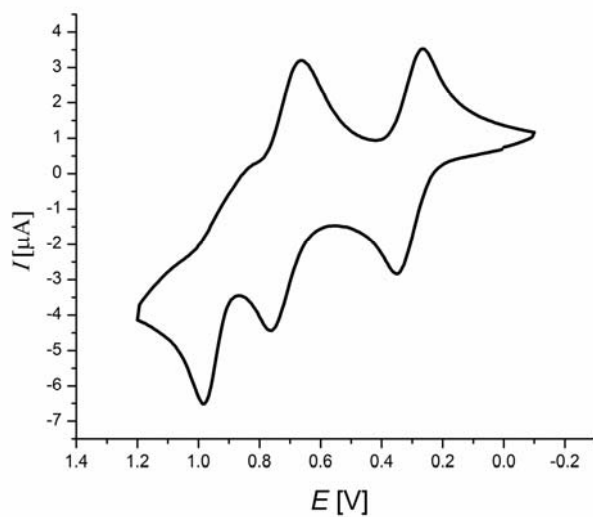

**Figure 20:** Cyclic voltammogram of 10-Hexyl-*N*<sup>3</sup>,*N*<sup>3</sup>,*N*<sup>7</sup>,*N*<sup>7</sup>-tetraphenyl-10H-phenothiazine-3,7-diamine **3h** (recorded in CH<sub>2</sub>Cl<sub>2</sub> at *T* = 293 K, 0.1 M electrolyte [Bu<sub>4</sub>N][PF<sub>6</sub>], *v* = 100 mV/s, Pt working electrode, Ag/AgCl reference and Pt counter electrode).

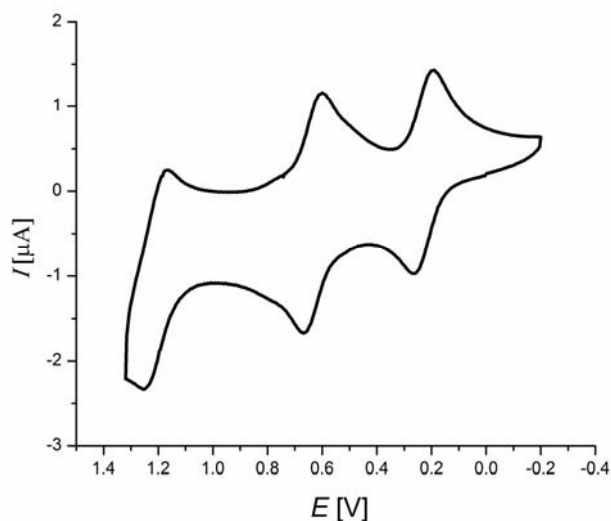

**Figure 21:** Cyclic voltammogram of 10-Hexyl- $N^3, N^3, N^7, N^7$ -tetrakis(4-methoxyphenyl)-10H-phenothiazine-3,7-diamine **3i** (recorded in  $\text{CH}_2\text{Cl}_2$  at  $T = 293 \text{ K}$ , 0.1 M electrolyte  $[\text{Bu}_4\text{N}][\text{PF}_6]$ ,  $\nu = 100 \text{ mV/s}$ , Pt working electrode, Ag/AgCl reference and Pt counter electrode).

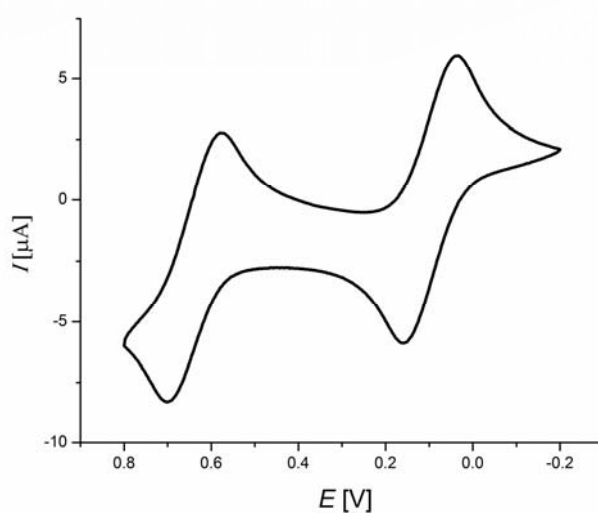

**Figure 22:** Cyclic voltammogram of  $N^3, N^3, N^7, N^7$ -tetraethyl-10-hexyl-10H-phenothiazine-3,7-diamine **3j** (recorded in  $\text{CH}_2\text{Cl}_2$  at  $T = 293 \text{ K}$ , 0.1 M electrolyte  $[\text{Bu}_4\text{N}][\text{PF}_6]$ ,  $\nu = 100 \text{ mV/s}$ , Pt working electrode, Ag/AgCl reference and Pt counter electrode).

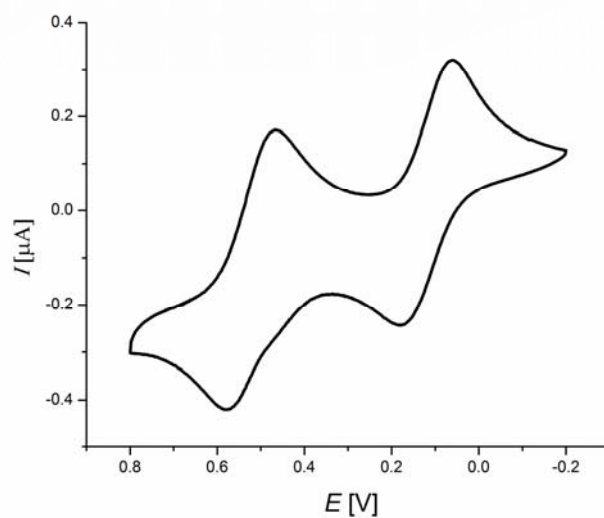

**Figure 23:** Cyclic voltammogram of 10-Hexyl-3,7-di(piperidin-1-yl)-10H-phenothiazine **3k** (recorded in CH<sub>2</sub>Cl<sub>2</sub> at *T* = 293 K, 0.1 M electrolyte [Bu<sub>4</sub>N][PF<sub>6</sub>], *v* = 100 mV/s, Pt working electrode, Ag/AgCl reference and Pt counter electrode).

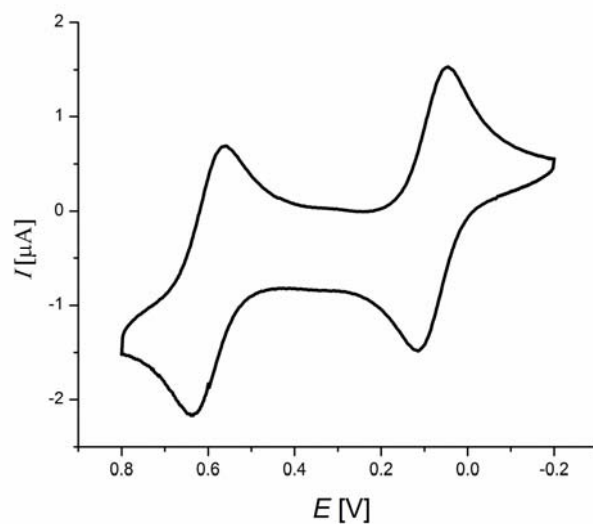

**Figure 24:** Cyclic voltammogram of 10-Hexyl-3,7-di(pyrrolidin-1-yl)-10H-phenothiazine **3l** (recorded in CH<sub>2</sub>Cl<sub>2</sub> at *T* = 293 K, 0.1 M electrolyte [Bu<sub>4</sub>N][PF<sub>6</sub>], *v* = 100 mV/s, Pt working electrode, Ag/AgCl reference and Pt counter electrode).

#### 4 Computed xyz-coordinates and energies of 3,7-dianilino substituted *N*-hexyl phenothiazines 3a-3l

The ground state geometries of the 3,7-dianilino substituted *N*-hexyl phenothiazines **3a-3l** were optimized by DFT calculation with the B3LYP: def2-TZVP functional in the program package TURBOMOLE V6.3.

XYZ-coordinates for Dimethyl 4,4'-((10-hexyl-10*H*-phenothiazine-3,7-diyl)bis-(azanediyl))dibenzoate **3a**

|   |         |         |         |
|---|---------|---------|---------|
| H | -1.6715 | -1.5018 | -2.2927 |
| C | -0.6503 | -1.1506 | -2.3449 |
| C | 1.9229  | -0.1722 | -2.5286 |
| C | 0.1764  | -1.2465 | -1.2207 |
| C | -0.1962 | -0.6292 | -3.5478 |
| C | 1.0986  | -0.1181 | -3.6554 |
| C | 1.4849  | -0.7566 | -1.3472 |
| H | -0.8552 | -0.6256 | -4.4042 |
| H | 2.9256  | 0.2361  | -2.5764 |
| N | -0.2783 | -1.787  | -5.0E-4 |
| S | 2.6202  | -0.9355 | -2.0E-4 |
| C | 1.4846  | -0.7567 | 1.3466  |
| C | -0.1968 | -0.6296 | 3.547   |
| C | 0.1762  | -1.2466 | 1.2198  |
| C | 1.9224  | -0.1724 | 2.5282  |
| C | 1.098   | -0.1184 | 3.6548  |
| C | -0.6507 | -1.1509 | 2.344   |
| H | 2.9251  | 0.236   | 2.5761  |
| H | -1.6718 | -1.5022 | 2.2916  |
| H | -0.8558 | -0.6262 | 4.4033  |
| C | -1.1588 | -2.9558 | -6.0E-4 |
| H | -1.8143 | -2.9133 | -0.8694 |
| H | -1.8154 | -2.9128 | 0.8674  |
| C | -0.3934 | -4.2832 | 2.0E-4  |
| H | 0.2598  | -4.3144 | 0.8779  |
| H | 0.2607  | -4.315  | -0.8768 |
| C | -1.3235 | -5.4967 | 2.0E-4  |
| H | -1.9814 | -5.4513 | -0.8762 |

|   |         |          |         |
|---|---------|----------|---------|
| H | -1.9821 | -5.4509  | 0.876   |
| C | -0.5811 | -6.8338  | 8.0E-4  |
| H | 0.0764  | -6.8817  | 0.8768  |
| H | 0.077   | -6.8822  | -0.8747 |
| C | -1.5088 | -8.0496  | 8.0E-4  |
| H | -2.1663 | -8.0009  | 0.8758  |
| H | -2.1657 | -8.0013  | -0.8748 |
| C | -0.7595 | -9.3812  | 0.0013  |
| H | -1.4499 | -10.2272 | 0.0013  |
| H | -0.1201 | -9.4751  | -0.8803 |
| H | -0.1206 | -9.4747  | 0.8834  |
| N | 1.6212  | 0.3953   | 4.852   |
| H | 2.6071  | 0.2463   | 4.9902  |
| N | 1.6219  | 0.3959   | -4.8524 |
| H | 2.6078  | 0.2469   | -4.9906 |
| C | 0.9877  | 1.1146   | 5.8499  |
| C | -0.1781 | 2.6018   | 7.9417  |
| C | 1.6486  | 1.2747   | 7.0818  |
| C | -0.2652 | 1.7256   | 5.6834  |
| C | -0.8321 | 2.4523   | 6.7162  |
| C | 1.0773  | 2.0052   | 8.1022  |
| H | 2.6172  | 0.8093   | 7.2281  |
| H | -0.7814 | 1.6538   | 4.7374  |
| H | -1.7942 | 2.9221   | 6.5668  |
| H | 1.5909  | 2.1214   | 9.0473  |
| C | 0.9883  | 1.1153   | -5.8502 |
| C | -0.178  | 2.6023   | -7.9418 |
| C | 1.6491  | 1.2754   | -7.0821 |
| C | -0.2646 | 1.7261   | -5.6835 |
| C | -0.8317 | 2.4528   | -6.7162 |
| C | 1.0775  | 2.0059   | -8.1025 |
| H | 2.6177  | 0.8102   | -7.2286 |
| H | -0.7806 | 1.6542   | -4.7375 |
| H | -1.7939 | 2.9225   | -6.5667 |
| H | 1.591   | 2.1222   | -9.0477 |
| C | -0.7465 | 3.367    | 9.0723  |
| O | -0.2027 | 3.5243   | 10.142  |
| O | -1.9635 | 3.8886   | 8.7903  |
| C | -2.5722 | 4.6502   | 9.841   |
| H | -1.9493 | 5.5044   | 10.1069 |
| H | -2.7207 | 4.0331   | 10.7271 |



|   |         |        |          |
|---|---------|--------|----------|
| H | -3.5278 | 4.9844 | 9.4448   |
| C | -0.7467 | 3.3674 | -9.0724  |
| O | -0.2031 | 3.5248 | -10.1421 |
| O | -1.9637 | 3.8889 | -8.7902  |
| C | -2.5727 | 4.6504 | -9.8408  |
| H | -1.95   | 5.5045 | -10.1068 |
| H | -3.5283 | 4.9844 | -9.4443  |
| H | -2.7213 | 4.0331 | -10.7267 |

HOMO level energy = -4.9801 eV

LUMO level energy = -1.3015 eV

HOMO-LUMO gap energy = 3.679 eV.

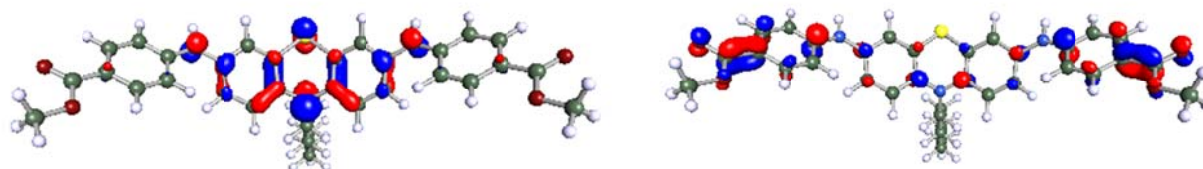

Figure 25: HOMO (left) and LUMO (right) levels of compound 3a

XYZ-coordinates for  $N^3, N^7$ -Bis(4-(*tert*-butyl)phenyl)-10-hexyl-10*H*-phenothiazine-3,7-diamine **3b**

|   |         |         |         |
|---|---------|---------|---------|
| H | 2.2409  | -0.7975 | 2.0993  |
| C | 2.3273  | -0.2286 | 1.1827  |
| C | 2.5623  | 1.3315  | -1.0784 |
| C | 1.2227  | -0.1262 | 0.3324  |
| C | 3.5315  | 0.4017  | 0.9054  |
| C | 3.6719  | 1.1935  | -0.2389 |
| C | 1.3672  | 0.6768  | -0.8067 |
| H | 4.3474  | 0.315   | 1.6085  |
| H | 2.6362  | 1.9455  | -1.9693 |
| N | 6.0E-4  | -0.7671 | 0.6285  |
| S | 0.0368  | 0.7968  | -1.9715 |
| C | -1.2181 | -0.1395 | 0.2899  |

|   |         |         |         |
|---|---------|---------|---------|
| C | -3.6634 | 1.1456  | -0.371  |
| C | -2.3504 | -0.2558 | 1.0999  |
| C | -1.3328 | 0.6607  | -0.8548 |
| C | -2.5255 | 1.299   | -1.1701 |
| C | -3.5531 | 0.3572  | 0.7786  |
| H | -2.2903 | -0.8242 | 2.0189  |
| H | -2.5764 | 1.9104  | -2.0643 |
| H | -4.3925 | 0.257   | 1.4513  |
| N | -4.8278 | 1.8317  | -0.726  |
| H | -4.6851 | 2.6704  | -1.263  |
| N | 4.8357  | 1.9073  | -0.5372 |
| H | 4.7031  | 2.7205  | -1.1145 |
| C | -6.1535 | 1.5633  | -0.3862 |
| C | -8.9071 | 1.1077  | 0.1955  |
| C | -7.0871 | 2.6033  | -0.4201 |
| C | -6.621  | 0.2829  | -0.0638 |
| C | -7.9612 | 0.0766  | 0.2239  |
| C | -8.429  | 2.3744  | -0.1447 |
| H | -6.7562 | 3.6074  | -0.6629 |
| H | -5.9415 | -0.5576 | -0.0615 |
| H | -8.2736 | -0.9325 | 0.4641  |
| H | -9.1031 | 3.2183  | -0.1899 |
| C | 6.1654  | 1.5927  | -0.2573 |
| C | 8.9265  | 1.069   | 0.227   |
| C | 6.609   | 0.3115  | 0.0762  |
| C | 7.1283  | 2.608   | -0.3523 |
| C | 8.4669  | 2.3453  | -0.1232 |
| C | 7.9586  | 0.0692  | 0.3158  |
| H | 5.9089  | -0.5101 | 0.1278  |
| H | 6.8149  | 3.6154  | -0.6048 |
| H | 9.1673  | 3.1667  | -0.2122 |
| H | 8.2451  | -0.9425 | 0.5675  |
| C | 10.4201 | 0.8263  | 0.4866  |
| C | 10.7154 | -0.6339 | 0.8619  |
| H | 11.7855 | -0.7573 | 1.0417  |
| H | 10.4342 | -1.3238 | 0.0634  |
| H | 10.192  | -0.9335 | 1.7726  |
| C | 11.2291 | 1.1675  | -0.7829 |
| H | 12.2966 | 1.0076  | -0.6102 |
| H | 11.0931 | 2.2082  | -1.081  |
| H | 10.9222 | 0.5377  | -1.6207 |

|   |          |         |         |
|---|----------|---------|---------|
| C | 10.8971  | 1.7245  | 1.6479  |
| H | 11.9608  | 1.564   | 1.8423  |
| H | 10.3465  | 1.5009  | 2.5643  |
| H | 10.7562  | 2.7833  | 1.4253  |
| C | -10.3799 | 0.82    | 0.5206  |
| C | -11.2504 | 2.0838  | 0.4421  |
| H | -11.2453 | 2.5194  | -0.5593 |
| H | -10.9217 | 2.848   | 1.1495  |
| H | -12.2847 | 1.8325  | 0.6862  |
| C | -10.9401 | -0.2109 | -0.4826 |
| H | -10.8825 | 0.1695  | -1.5046 |
| H | -11.9879 | -0.4298 | -0.2599 |
| H | -10.3888 | -1.1515 | -0.4454 |
| C | -10.4931 | 0.2489  | 1.9501  |
| H | -9.9305  | -0.6794 | 2.0594  |
| H | -11.5372 | 0.0367  | 2.195   |
| H | -10.1098 | 0.9599  | 2.685   |
| C | -0.0011  | -2.1715 | 1.0418  |
| H | -0.863   | -2.3538 | 1.6842  |
| H | 0.8775   | -2.3586 | 1.6588  |
| C | -0.0203  | -3.1534 | -0.1355 |
| H | 0.8525   | -2.9642 | -0.7678 |
| H | -0.9013  | -2.9495 | -0.7516 |
| C | -0.0294  | -4.6142 | 0.3166  |
| H | -0.8994  | -4.7909 | 0.96    |
| H | 0.8519   | -4.8086 | 0.9394  |
| C | -0.0536  | -5.6116 | -0.843  |
| H | 0.8161   | -5.4379 | -1.487  |
| H | -0.9342  | -5.4189 | -1.4665 |
| C | -0.0644  | -7.0739 | -0.3946 |
| H | -0.9335  | -7.2466 | 0.2493  |
| H | 0.8163   | -7.2663 | 0.2277  |
| C | -0.0901  | -8.0631 | -1.5591 |
| H | -0.0972  | -9.0963 | -1.2052 |
| H | 0.7849   | -7.9385 | -2.2021 |
| H | -0.978   | -7.9189 | -2.1801 |

HOMO level energy = -4.5836 eV

LUMO level energy = -0.6021 eV

HOMO-LUMO gap energy = 3.981 eV.

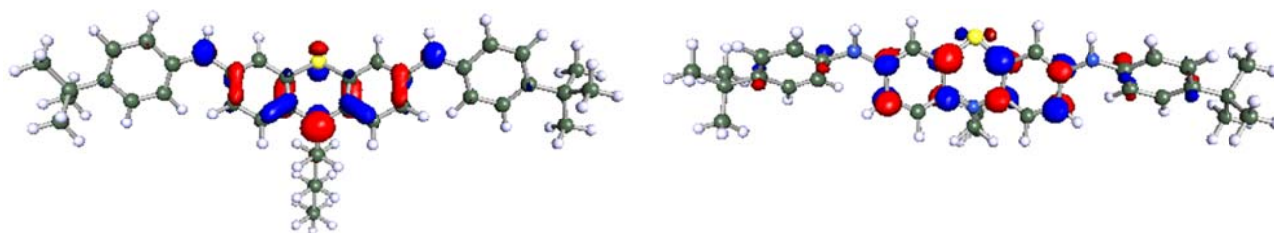

Figure 26: HOMO (left) and LUMO (right) levels of compound 3b

XYZ-coordinates for 10-Hexyl- $N^3, N^7$ -bis(4-methoxyphenyl)-10*H*-phenothiazine-3,7-diamine **3c**

|   |         |         |         |
|---|---------|---------|---------|
| H | -2.0443 | 0.673   | 2.2679  |
| C | -1.1272 | 0.1028  | 2.3404  |
| C | 1.1355  | -1.4579 | 2.5415  |
| C | -0.2978 | -0.0038 | 1.2211  |
| C | -0.8297 | -0.5224 | 3.5428  |
| C | 0.3144  | -1.3186 | 3.6659  |
| C | 0.8439  | -0.8054 | 1.3504  |
| H | -1.5165 | -0.4269 | 4.3714  |
| H | 2.0255  | -2.0749 | 2.6001  |
| N | -0.6179 | 0.6306  | 2.0E-4  |
| S | 1.9849  | -0.9344 | 3.0E-4  |
| C | 0.8438  | -0.8057 | -1.3498 |
| C | -0.8297 | -0.5229 | -3.5423 |
| C | -0.2979 | -0.0039 | -1.2207 |
| C | 1.1351  | -1.4587 | -2.5406 |
| C | 0.3141  | -1.3195 | -3.6651 |
| C | -1.1271 | 0.1027  | -2.3401 |
| H | 2.025   | -2.076  | -2.5991 |
| H | -2.0439 | 0.6735  | -2.2679 |
| H | -1.5166 | -0.4277 | -4.3709 |
| N | 0.639   | -2.0245 | 4.8236  |
| H | 1.2386  | -2.8204 | 4.688   |
| N | 0.6388  | -2.0253 | -4.8228 |
| H | 1.2381  | -2.8215 | -4.6874 |
| C | 0.2392  | -1.7924 | 6.1453  |
| C | -0.4623 | -1.4263 | 8.8504  |
| C | 0.1851  | -2.8761 | 7.0349  |

|   |         |         |          |
|---|---------|---------|----------|
| C | -0.0588 | -0.5245 | 6.6441   |
| C | -0.4169 | -0.3419 | 7.9785   |
| C | -0.1471 | -2.697  | 8.3642   |
| H | 0.4044  | -3.8735 | 6.6706   |
| H | 0.0044  | 0.339   | 5.9968   |
| H | -0.641  | 0.6576  | 8.3227   |
| H | -0.1827 | -3.5387 | 9.0438   |
| C | 0.2394  | -1.7925 | -6.1446  |
| C | -0.4623 | -1.4248 | -8.8493  |
| C | 0.184   | -2.8759 | -7.0345  |
| C | -0.0574 | -0.5241 | -6.6428  |
| C | -0.4156 | -0.3407 | -7.9771  |
| C | -0.1482 | -2.696  | -8.3636  |
| H | 0.4023  | -3.8736 | -6.6705  |
| H | 0.0068  | 0.3391  | -5.9953  |
| H | -0.6388 | 0.6591  | -8.321   |
| H | -0.1848 | -3.5374 | -9.0435  |
| O | -0.7968 | -1.3538 | 10.1735  |
| O | -0.797  | -1.3516 | -10.1724 |
| C | -1.1182 | -0.0869 | 10.7178  |
| H | -0.2738 | 0.6067  | 10.6484  |
| H | -1.3539 | -0.2601 | 11.7657  |
| H | -1.9881 | 0.3554  | 10.2212  |
| C | -1.1171 | -0.0842 | -10.7163 |
| H | -1.9864 | 0.3589  | -10.2193 |
| H | -1.3533 | -0.2569 | -11.7642 |
| H | -0.2719 | 0.6084  | -10.6469 |
| C | -1.0116 | 2.0401  | 1.0E-4   |
| H | -1.6388 | 2.232   | 0.871    |
| H | -1.6399 | 2.2317  | -0.87    |
| C | 0.1756  | 3.0102  | -8.0E-4  |
| H | 0.7973  | 2.808   | -0.8782  |
| H | 0.7985  | 2.808   | 0.8758   |
| C | -0.2637 | 4.4749  | -4.0E-4  |
| H | -0.8964 | 4.6655  | -0.8754  |
| H | -0.8945 | 4.6657  | 0.8759   |
| C | 0.9034  | 5.4639  | -0.0018  |
| H | 1.5369  | 5.2761  | 0.8726   |
| H | 1.5347  | 5.2762  | -0.8778  |
| C | 0.4654  | 6.9294  | -0.0012  |
| H | -0.1654 | 7.1163  | 0.8746   |

|   |         |        |         |
|---|---------|--------|---------|
| H | -0.1678 | 7.1163 | -0.8753 |
| C | 1.6365  | 7.911  | -0.0028 |
| H | 1.2896  | 8.9466 | -0.0023 |
| H | 2.2664  | 7.7725 | -0.8852 |
| H | 2.2689  | 7.7724 | 0.8778  |

HOMO level energy = -4.4544 eV

LUMO level energy = -0.5139 eV

HOMO-LUMO gap energy = 3.94 eV.

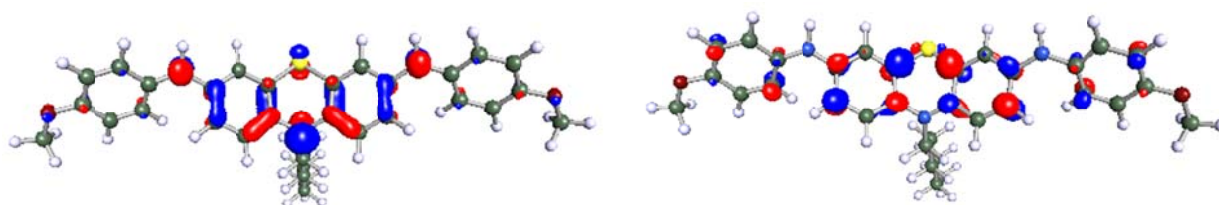

Figure 27: HOMO (left) and LUMO (right) levels of compound 3c

XYZ-coordinates for  $N^1, N^{1'}$ -(10-Hexyl-10*H*-phenothiazine-3,7-diyl)bis( $N^4, N^{4'}$ -dimethylbenzene-1,4-diamine) **3d**

|   |         |         |         |
|---|---------|---------|---------|
| H | -2.0285 | 0.671   | 2.2646  |
| C | -1.0758 | 0.1628  | 2.3437  |
| C | 1.2891  | -1.2363 | 2.5539  |
| C | -0.2468 | 0.0964  | 1.2213  |
| C | -0.7298 | -0.4187 | 3.5544  |
| C | 0.469   | -1.1307 | 3.6834  |
| C | 0.9462  | -0.6251 | 1.354   |
| H | -1.4138 | -0.3543 | 4.3883  |
| H | 2.2189  | -1.7913 | 2.6163  |
| N | -0.6194 | 0.7047  | 0.0     |
| S | 2.0874  | -0.7051 | -1.0E-4 |
| C | -0.2467 | 0.0967  | -1.2214 |
| C | 0.4688  | -1.1305 | -3.6835 |
| C | -1.0757 | 0.1633  | -2.3438 |
| C | 0.946   | -0.625  | -1.354  |

|   |         |         |         |
|---|---------|---------|---------|
| C | 1.2888  | -1.2363 | -2.554  |
| C | -0.7297 | -0.4182 | -3.5546 |
| H | -2.0283 | 0.6718  | -2.2648 |
| H | 2.2185  | -1.7917 | -2.6163 |
| H | -1.4137 | -0.3535 | -4.3885 |
| C | -1.012  | 2.1161  | 2.0E-4  |
| H | -1.6405 | 2.3033  | -0.8712 |
| H | -1.6402 | 2.3032  | 0.8718  |
| C | 0.1695  | 3.0932  | 1.0E-4  |
| H | 0.7929  | 2.8956  | -0.8772 |
| H | 0.7932  | 2.8954  | 0.8771  |
| C | -0.2797 | 4.5549  | 3.0E-4  |
| H | -0.9127 | 4.7412  | 0.8761  |
| H | -0.9131 | 4.7413  | -0.8751 |
| C | 0.8802  | 5.5523  | 1.0E-4  |
| H | 1.5137  | 5.3691  | -0.8753 |
| H | 1.5142  | 5.3689  | 0.8751  |
| C | 0.4317  | 7.0145  | 4.0E-4  |
| H | -0.2014 | 7.1968  | 0.8755  |
| H | -0.2019 | 7.197   | -0.8744 |
| C | 1.5956  | 8.0048  | 1.0E-4  |
| H | 1.2414  | 9.0379  | 3.0E-4  |
| H | 2.2275  | 7.8707  | -0.8816 |
| H | 2.2281  | 7.8705  | 0.8814  |
| N | 0.8483  | -1.7815 | -4.8537 |
| H | 1.5326  | -2.5098 | -4.7416 |
| N | 0.8486  | -1.7815 | 4.8536  |
| H | 1.5331  | -2.5096 | 4.7417  |
| C | 0.4124  | -1.5543 | -6.1684 |
| C | -0.3722 | -1.1715 | -8.8846 |
| C | 0.0596  | -0.2913 | -6.6494 |
| C | 0.3853  | -2.6154 | -7.076  |
| C | 0.0233  | -2.432  | -8.4015 |
| C | -0.3298 | -0.1055 | -7.9674 |
| H | 0.1066  | 0.567   | -5.993  |
| H | 0.6579  | -3.6094 | -6.7386 |
| H | 0.0375  | -3.291  | -9.0557 |
| H | -0.5863 | 0.8954  | -8.2816 |
| C | 0.4127  | -1.5543 | 6.1684  |
| C | -0.3722 | -1.1714 | 8.8844  |
| C | 0.0596  | -0.2913 | 6.6492  |

|   |         |         |          |
|---|---------|---------|----------|
| C | 0.3857  | -2.6154 | 7.076    |
| C | 0.0236  | -2.4319 | 8.4015   |
| C | -0.3298 | -0.1055 | 7.9671   |
| H | 0.1065  | 0.5669  | 5.9928   |
| H | 0.6584  | -3.6094 | 6.7387   |
| H | 0.0379  | -3.2908 | 9.0557   |
| H | -0.5865 | 0.8954  | 8.2813   |
| N | -0.8005 | -0.9905 | 10.198   |
| N | -0.8005 | -0.9906 | -10.1982 |
| C | -0.9065 | 0.3578  | -10.7192 |
| H | 0.0526  | 0.8967  | -10.721  |
| H | -1.6211 | 0.9464  | -10.1401 |
| H | -1.275  | 0.3144  | -11.7424 |
| C | -0.5689 | -2.0492 | -11.1603 |
| H | -1.0638 | -2.9728 | -10.8527 |
| H | 0.4984  | -2.271  | -11.31   |
| H | -0.9936 | -1.7567 | -12.1188 |
| C | -0.5689 | -2.049  | 11.1602  |
| H | -0.9938 | -1.7565 | 12.1187  |
| H | 0.4984  | -2.2706 | 11.31    |
| H | -1.0637 | -2.9727 | 10.8527  |
| C | -0.9068 | 0.358   | 10.7189  |
| H | -1.6215 | 0.9463  | 10.1397  |
| H | 0.0522  | 0.897   | 10.7208  |
| H | -1.2755 | 0.3146  | 11.742   |

HOMO level energy = -4.2352 eV

LUMO level energy = -0.3221 eV

HOMO-LUMO gap energy = 3.913 eV.

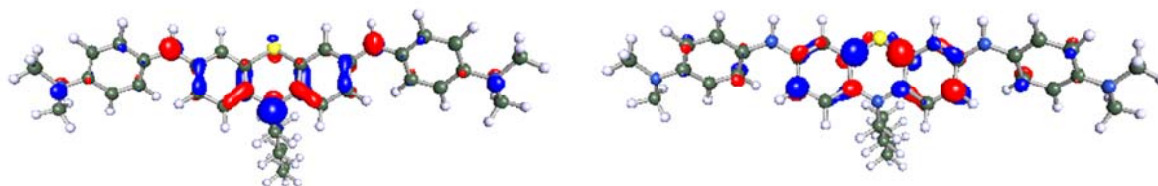

Figure 28: HOMO (left) and LUMO (right) levels of compound **3d**



XYZ-coordinates for 10-Hexyl-*N*<sup>3</sup>,*N*<sup>7</sup>-dimethyl-*N*<sup>3</sup>,*N*<sup>7</sup>-diphenyl-10*H*-phenothiazine-3,7-diamine **3e**

|   |         |         |         |
|---|---------|---------|---------|
| H | -2.355  | 0.6903  | -2.6553 |
| C | -2.1889 | 0.0675  | -1.7856 |
| C | -1.7447 | -1.6173 | 0.3563  |
| C | -1.0238 | 0.2495  | -1.0305 |
| C | -3.1254 | -0.8978 | -1.466  |
| C | -2.9271 | -1.7631 | -0.3767 |
| C | -0.8222 | -0.6178 | 0.0442  |
| H | -4.0071 | -1.0056 | -2.0821 |
| H | -1.5315 | -2.2645 | 1.1947  |
| N | -0.0878 | 1.2522  | -1.3757 |
| S | 0.5911  | -0.4176 | 1.096   |
| C | 1.2897  | 1.0236  | -1.146  |
| C | 4.0705  | 0.5826  | -0.712  |
| C | 2.2559  | 1.5582  | -1.9954 |
| C | 1.7477  | 0.241   | -0.0762 |
| C | 3.1011  | 0.0145  | 0.1289  |
| C | 3.6156  | 1.3641  | -1.7829 |
| H | 1.9404  | 2.1374  | -2.8537 |
| H | 3.4073  | -0.594  | 0.9687  |
| H | 4.3138  | 1.809   | -2.4765 |
| C | -0.5586 | 2.6387  | -1.4732 |
| H | -1.5018 | 2.6492  | -2.0213 |
| H | 0.1513  | 3.2053  | -2.0772 |
| C | -0.7421 | 3.3201  | -0.1123 |
| H | -1.4451 | 2.7278  | 0.4786  |
| H | 0.2124  | 3.2988  | 0.4227  |
| C | -1.2292 | 4.7656  | -0.2346 |
| H | -2.1942 | 4.7845  | -0.7554 |
| H | -0.5315 | 5.3213  | -0.8713 |
| C | -1.3652 | 5.5047  | 1.1028  |
| H | -1.5585 | 6.5644  | 0.9013  |
| H | -0.4058 | 5.4679  | 1.6321  |
| C | -2.4688 | 4.9741  | 2.0219  |
| H | -3.4222 | 4.9929  | 1.4817  |
| H | -2.2782 | 3.9254  | 2.2667  |
| C | -2.602  | 5.7734  | 3.3179  |
| H | -3.4022 | 5.38    | 3.9487  |
| H | -2.8257 | 6.8242  | 3.1149  |

|   |         |         |         |
|---|---------|---------|---------|
| H | -1.6765 | 5.7401  | 3.8984  |
| N | 5.4357  | 0.409   | -0.4519 |
| N | -3.8504 | -2.7798 | -0.092  |
| C | 6.3989  | 1.2207  | -1.1795 |
| H | 6.1379  | 2.2789  | -1.1138 |
| H | 6.4627  | 0.9449  | -2.2413 |
| H | 7.384   | 1.0825  | -0.7421 |
| C | -3.4578 | -3.8478 | 0.8148  |
| H | -4.1994 | -4.6414 | 0.7776  |
| H | -3.3838 | -3.5077 | 1.8572  |
| H | -2.4933 | -4.2633 | 0.5177  |
| C | 5.923   | -0.7588 | 0.1944  |
| C | 6.9406  | -3.0443 | 1.4627  |
| C | 6.8884  | -0.647  | 1.1996  |
| C | 5.4757  | -2.0332 | -0.1679 |
| C | 5.975   | -3.1624 | 0.4682  |
| C | 7.3973  | -1.7806 | 1.8209  |
| H | 7.2278  | 0.3357  | 1.5034  |
| H | 4.7314  | -2.1338 | -0.9471 |
| H | 5.6149  | -4.1409 | 0.175   |
| H | 8.1418  | -1.6729 | 2.6002  |
| H | 7.3302  | -3.9265 | 1.9544  |
| C | -5.2406 | -2.5827 | -0.3019 |
| C | -7.9998 | -2.2463 | -0.6933 |
| C | -5.8666 | -1.376  | 0.0286  |
| C | -6.0197 | -3.618  | -0.8292 |
| C | -7.3861 | -3.4523 | -1.0145 |
| C | -7.2304 | -1.21   | -0.1744 |
| H | -5.2781 | -0.5685 | 0.444   |
| H | -5.5453 | -4.5506 | -1.1087 |
| H | -7.9703 | -4.2657 | -1.4273 |
| H | -7.6962 | -0.2678 | 0.0882  |
| H | -9.0632 | -2.1149 | -0.8472 |

HOMO level energy = -4.4982 eV

LUMO level energy = -0.5810 eV

HOMO-LUMO gap energy = 3.917 eV.

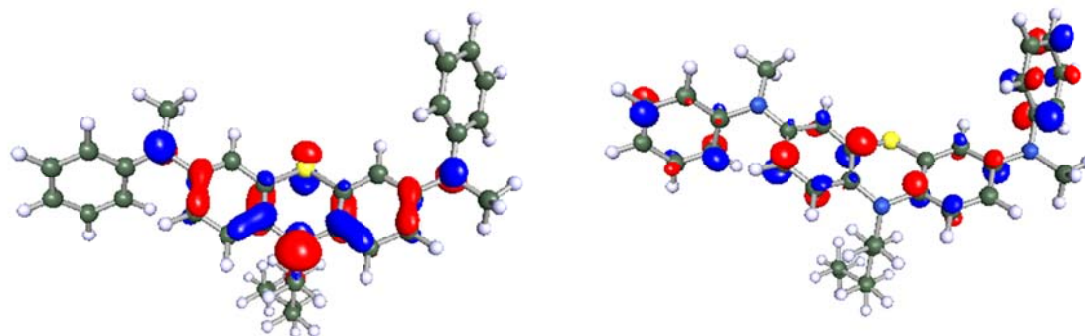

Figure 29: HOMO (left) and LUMO (right) levels of compound **3e**

XYZ-coordinates for 10-Hexyl- $N^3, N^7$ -bis(4-methoxyphenyl)- $N^3, N^7$ -dimethyl-10H-phenothiazine-3,7-diamine **3f**

|   |         |         |         |
|---|---------|---------|---------|
| H | -1.8499 | -3.4032 | -0.3477 |
| C | -2.2292 | -2.4111 | -0.5356 |
| C | -3.2823 | 0.1053  | -0.9343 |
| C | -1.3764 | -1.4104 | -1.0157 |
| C | -3.5709 | -2.1674 | -0.2709 |
| C | -4.1265 | -0.9051 | -0.4656 |
| C | -1.9459 | -0.1413 | -1.2165 |
| H | -4.1847 | -2.9709 | 0.1156  |
| H | -3.6787 | 1.0977  | -1.1055 |
| N | -0.0213 | -1.6632 | -1.3108 |
| S | -1.0133 | 1.1477  | -1.9873 |
| C | 0.9498  | -0.6457 | -1.242  |
| C | 2.908   | 1.4168  | -1.1166 |
| C | 2.297   | -0.9215 | -0.9785 |
| C | 0.6119  | 0.7015  | -1.4605 |
| C | 1.5636  | 1.7072  | -1.3577 |
| C | 3.2589  | 0.0805  | -0.9428 |
| H | 2.6193  | -1.9373 | -0.812  |
| H | 1.2537  | 2.7373  | -1.4851 |
| H | 4.2907  | -0.1842 | -0.7542 |
| C | 0.4115  | -3.0466 | -1.4988 |
| H | -0.3971 | -3.5661 | -2.0179 |
| H | 1.2564  | -3.0299 | -2.1915 |
| C | 0.8018  | -3.8522 | -0.2483 |
| H | -0.0125 | -3.838  | 0.4802  |

|   |         |         |         |
|---|---------|---------|---------|
| H | 1.6523  | -3.3853 | 0.253   |
| C | 1.1474  | -5.2988 | -0.6061 |
| H | 0.2824  | -5.7685 | -1.0891 |
| H | 1.9502  | -5.3062 | -1.3537 |
| C | 1.5725  | -6.1435 | 0.5951  |
| H | 0.7766  | -6.1277 | 1.3493  |
| H | 2.4472  | -5.6838 | 1.0692  |
| C | 1.8975  | -7.5945 | 0.2378  |
| H | 1.0214  | -8.0544 | -0.2318 |
| H | 2.6897  | -7.6106 | -0.5189 |
| C | 2.327   | -8.4304 | 1.4419  |
| H | 1.5422  | -8.4606 | 2.2024  |
| H | 3.2234  | -8.0163 | 1.9102  |
| H | 2.5488  | -9.4602 | 1.1548  |
| N | 3.8659  | 2.4675  | -1.0837 |
| N | -5.5079 | -0.6788 | -0.2282 |
| C | -6.4425 | -1.4572 | -1.0273 |
| H | -6.0394 | -2.4545 | -1.1842 |
| H | -6.6305 | -1.0131 | -2.0157 |
| H | -7.3954 | -1.5518 | -0.5044 |
| C | 4.0861  | 3.1813  | -2.3317 |
| H | 3.1425  | 3.2714  | -2.8647 |
| H | 4.7984  | 2.6695  | -2.9956 |
| H | 4.463   | 4.1853  | -2.1297 |
| C | 4.9067  | 2.4381  | -0.1377 |
| C | 6.9366  | 2.4553  | 1.8285  |
| C | 4.6483  | 2.0286  | 1.184   |
| C | 6.2026  | 2.8608  | -0.4373 |
| C | 7.2074  | 2.8767  | 0.5338  |
| C | 5.6409  | 2.0301  | 2.1417  |
| H | 3.6498  | 1.7133  | 1.4557  |
| H | 6.4561  | 3.1825  | -1.4372 |
| H | 8.1944  | 3.2152  | 0.2523  |
| H | 5.4286  | 1.7162  | 3.1559  |
| C | -5.9478 | 0.5495  | 0.3034  |
| C | -6.8511 | 2.9661  | 1.457   |
| C | -7.1247 | 1.172   | -0.1384 |
| C | -5.2425 | 1.1687  | 1.3416  |
| C | -5.6768 | 2.3613  | 1.9068  |
| C | -7.5697 | 2.3549  | 0.433   |
| H | -7.7036 | 0.7392  | -0.9418 |

|   |         |        |        |
|---|---------|--------|--------|
| H | -4.3388 | 0.7084 | 1.7184 |
| H | -5.0961 | 2.7999 | 2.7058 |
| H | -8.4795 | 2.8254 | 0.0825 |
| O | -7.3676 | 4.1332 | 1.9489 |
| O | 7.8449  | 2.4237 | 2.851  |
| C | -6.6779 | 4.7876 | 2.998  |
| H | -6.6202 | 4.1619 | 3.8948 |
| H | -7.2534 | 5.6831 | 3.224  |
| H | -5.6658 | 5.0773 | 2.6965 |
| C | 9.1728  | 2.8298 | 2.5775 |
| H | 9.6364  | 2.1991 | 1.8113 |
| H | 9.7216  | 2.7211 | 3.5109 |
| H | 9.216   | 3.8755 | 2.2543 |

HOMO level energy = -4.5530 eV

LUMO level energy = -0.6901 eV

HOMO-LUMO gap energy = 3.863 eV.

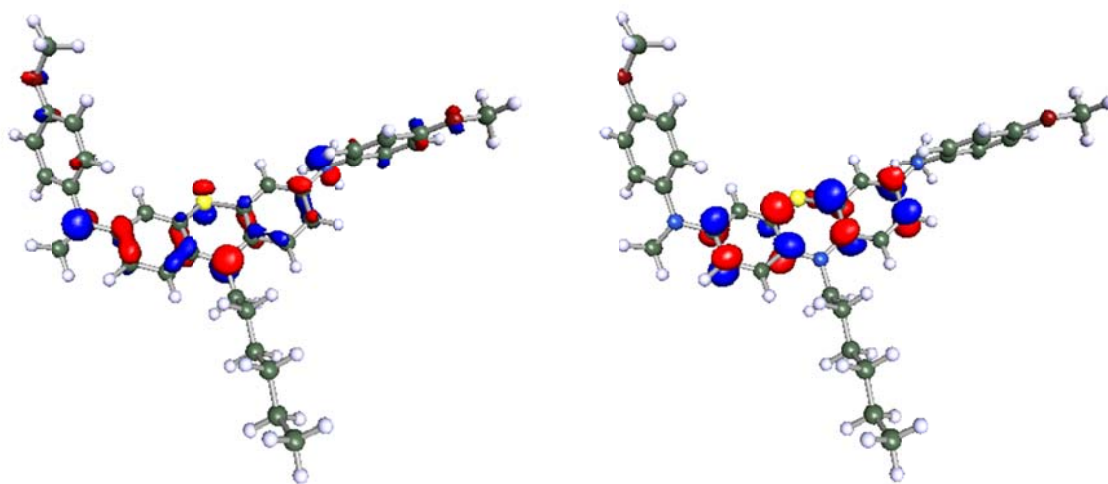

Figure 30: HOMO (left) and LUMO (right) levels of compound **3f**

XYZ-coordinates for 3,7-Di(9*H*-carbazol-9-yl)-10-hexyl-10*H*-phenothiazine **3g**

|   |         |         |         |
|---|---------|---------|---------|
| H | 2.4735  | -2.5495 | 0.8383  |
| C | 2.4614  | -1.4762 | 0.7391  |
| C | 2.5269  | 1.2671  | 0.4396  |
| C | 1.2606  | -0.7668 | 0.8736  |
| C | 3.6689  | -0.8334 | 0.4962  |
| C | 3.7128  | 0.5442  | 0.3266  |
| C | 1.3306  | 0.6327  | 0.7472  |
| H | 4.5794  | -1.4134 | 0.4266  |
| H | 2.5398  | 2.3416  | 0.3084  |
| N | 0.0432  | -1.4186 | 1.1477  |
| S | -0.0723 | 1.6437  | 1.0993  |
| C | -1.3644 | 0.5295  | 0.6451  |
| C | -3.5518 | -1.1136 | 0.1994  |
| C | -1.1963 | -0.8612 | 0.7791  |
| C | -2.5853 | 1.0726  | 0.2692  |
| C | -3.6947 | 0.2589  | 0.0471  |
| C | -2.3244 | -1.6605 | 0.553   |
| H | -2.6832 | 2.1468  | 0.178   |
| H | -2.2578 | -2.7329 | 0.6391  |
| H | -4.3967 | -1.7659 | 0.0223  |
| N | -4.9406 | 0.8283  | -0.3201 |
| N | 4.9349  | 1.2061  | 0.0432  |
| C | 0.0781  | -2.8078 | 1.6123  |
| H | -0.813  | -2.9654 | 2.2228  |
| H | 0.9269  | -2.8993 | 2.2926  |
| C | 0.1625  | -3.9041 | 0.5383  |
| H | 1.0532  | -3.7603 | -0.0769 |
| H | -0.6836 | -3.8237 | -0.1478 |
| C | 0.1881  | -5.3015 | 1.161   |
| H | -0.7058 | -5.4409 | 1.7802  |
| H | 1.0423  | -5.3804 | 1.8441  |
| C | 0.2645  | -6.4272 | 0.1285  |
| H | -0.5903 | -6.3508 | -0.5538 |
| H | 1.1585  | -6.2904 | -0.4907 |
| C | 0.2903  | -7.8251 | 0.7486  |
| H | -0.6026 | -7.9608 | 1.3682  |
| H | 1.1456  | -7.9017 | 1.4288  |
| C | 0.3642  | -8.944  | -0.2891 |
| H | -0.4966 | -8.916  | -0.9624 |

|   |         |         |         |
|---|---------|---------|---------|
| H | 0.3814  | -9.927  | 0.1856  |
| H | 1.2649  | -8.8556 | -0.9019 |
| C | -7.146  | 1.4317  | -0.2808 |
| C | -7.6558 | 0.1684  | 2.1426  |
| C | -6.1272 | 0.7302  | 0.4052  |
| C | -8.4294 | 1.4848  | 0.2637  |
| C | -8.6788 | 0.8501  | 1.4713  |
| C | -6.3703 | 0.0994  | 1.6231  |
| H | -9.2211 | 2.0183  | -0.2481 |
| H | -9.6706 | 0.8843  | 1.9039  |
| H | -5.5847 | -0.4227 | 2.1525  |
| H | -7.8691 | -0.3136 | 3.0886  |
| C | -5.1853 | 1.5876  | -1.4639 |
| C | -6.1688 | 3.1008  | -3.5624 |
| C | -6.5444 | 1.9791  | -1.4748 |
| C | -4.3181 | 1.9357  | -2.4971 |
| C | -4.8278 | 2.6965  | -3.5405 |
| C | -7.0305 | 2.7432  | -2.5363 |
| H | -3.2825 | 1.6236  | -2.4923 |
| H | -4.1726 | 2.9811  | -4.3543 |
| H | -8.0686 | 3.0516  | -2.5605 |
| H | -6.5334 | 3.6954  | -4.3902 |
| C | 5.7393  | 0.9856  | -1.074  |
| C | 7.6324  | 0.9328  | -3.0923 |
| C | 6.8724  | 1.8289  | -1.0001 |
| C | 5.5394  | 0.1267  | -2.1522 |
| C | 6.4996  | 0.1117  | -3.1545 |
| C | 7.8219  | 1.7936  | -2.0218 |
| H | 4.6632  | -0.5049 | -2.2128 |
| H | 6.366   | -0.5478 | -4.0031 |
| H | 8.6951  | 2.4334  | -1.9822 |
| H | 8.3625  | 0.8962  | -3.8907 |
| C | 6.7446  | 2.5933  | 0.2193  |
| C | 5.9311  | 3.6756  | 2.6477  |
| C | 5.5391  | 2.1822  | 0.8347  |
| C | 7.5352  | 3.5624  | 0.8377  |
| C | 7.1229  | 4.1011  | 2.0473  |
| C | 5.1258  | 2.7129  | 2.0546  |
| H | 8.4616  | 3.8888  | 0.3808  |
| H | 7.727   | 4.8548  | 2.536   |
| H | 4.2106  | 2.386   | 2.5298  |

H                    5.6297            4.1039            3.5955

HOMO level energy = -5.1947 eV

LUMO level energy = -1.1877 eV

HOMO-LUMO gap energy = 4.007 eV.

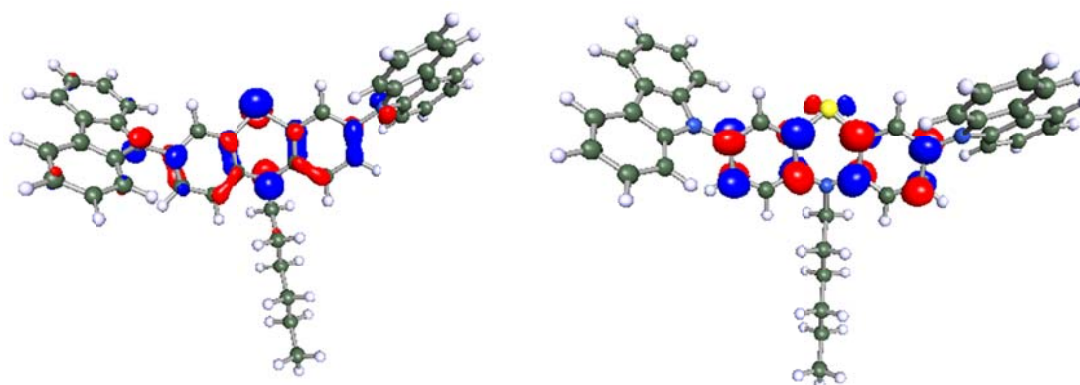

Figure 31: HOMO (left) and LUMO (right) levels of compound 3g

XYZ-coordinates for 10-Hexyl- $N^3, N^3, N^7, N^7$ -tetraphenyl-10*H*-phenothiazine-3,7-diamine  
**3h**

|   |         |         |         |
|---|---------|---------|---------|
| H | 2.2732  | -2.606  | -0.7912 |
| C | 2.3221  | -1.5375 | -0.6555 |
| C | 2.5479  | 1.1822  | -0.263  |
| C | 1.1664  | -0.7558 | -0.7832 |
| C | 3.562   | -0.9771 | -0.3763 |
| C | 3.6941  | 0.3914  | -0.1585 |
| C | 1.321   | 0.6309  | -0.6063 |
| H | 4.4297  | -1.6192 | -0.3055 |
| H | 2.6176  | 2.2506  | -0.1038 |
| N | -0.0854 | -1.3207 | -1.0991 |
| S | -0.0177 | 1.7356  | -0.9293 |
| C | -1.2925 | -0.7058 | -0.7113 |
| C | -3.73   | 0.5414  | 0.064   |



|   |         |         |         |
|---|---------|---------|---------|
| C | -1.3787 | 0.6854  | -0.5203 |
| C | -2.471  | -1.4385 | -0.5234 |
| C | -3.6637 | -0.8322 | -0.1495 |
| C | -2.5646 | 1.2879  | -0.1257 |
| H | -2.4731 | -2.5086 | -0.656  |
| H | -4.5475 | -1.4412 | -0.0148 |
| H | -2.5873 | 2.3607  | 0.0165  |
| N | -4.9405 | 1.1715  | 0.4555  |
| N | 4.9501  | 0.9706  | 0.1627  |
| C | -4.9336 | 2.1175  | 1.5088  |
| C | -4.9063 | 4.0005  | 3.5907  |
| C | -4.1241 | 1.9258  | 2.6343  |
| C | -5.7283 | 3.2682  | 1.4413  |
| C | -5.7178 | 4.1922  | 2.4769  |
| C | -4.1079 | 2.8636  | 3.6579  |
| H | -3.5064 | 1.0402  | 2.7014  |
| H | -6.353  | 3.4346  | 0.5737  |
| H | -6.3386 | 5.0769  | 2.4039  |
| H | -3.4736 | 2.696   | 4.5199  |
| H | -4.8953 | 4.7268  | 4.3931  |
| C | -6.1486 | 0.8327  | -0.2024 |
| C | -8.5363 | 0.1467  | -1.5091 |
| C | -7.3342 | 0.6613  | 0.5214  |
| C | -6.1767 | 0.6537  | -1.5902 |
| C | -7.3584 | 0.3079  | -2.2317 |
| C | -8.5147 | 0.3296  | -0.13   |
| H | -7.3256 | 0.7903  | 1.5956  |
| H | -5.2677 | 0.7862  | -2.1619 |
| H | -7.3594 | 0.1772  | -3.307  |
| H | -9.4211 | 0.2002  | 0.4489  |
| H | -9.4571 | -0.1177 | -2.0128 |
| C | 5.3713  | 2.1468  | -0.5051 |
| C | 6.1835  | 4.4846  | -1.8288 |
| C | 5.1441  | 2.3058  | -1.8768 |
| C | 6.0104  | 3.177   | 0.1941  |
| C | 6.4176  | 4.3281  | -0.4663 |
| C | 5.5407  | 3.4672  | -2.5262 |
| H | 4.6532  | 1.516   | -2.43   |
| H | 6.1854  | 3.071   | 1.2566  |
| H | 6.9079  | 5.1151  | 0.0939  |
| H | 5.355   | 3.5705  | -3.5884 |

|   |         |         |         |
|---|---------|---------|---------|
| H | 6.4957  | 5.3868  | -2.3387 |
| C | 5.7657  | 0.3711  | 1.1527  |
| C | 7.3789  | -0.8299 | 3.1118  |
| C | 7.1537  | 0.296   | 0.987   |
| C | 5.1982  | -0.1666 | 2.3139  |
| C | 5.9991  | -0.7658 | 3.2767  |
| C | 7.9482  | -0.2916 | 1.9621  |
| H | 7.6058  | 0.7011  | 0.0915  |
| H | 4.1272  | -0.1126 | 2.4569  |
| H | 5.5398  | -1.173  | 4.1694  |
| H | 9.0201  | -0.3402 | 1.8136  |
| H | 8.0011  | -1.2923 | 3.8673  |
| C | -0.1285 | -2.6864 | -1.6211 |
| H | 0.7228  | -2.8022 | -2.2952 |
| H | -1.0206 | -2.7652 | -2.2463 |
| C | -0.1244 | -3.8323 | -0.5959 |
| H | 0.7656  | -3.7696 | 0.0341  |
| H | -0.9735 | -3.7307 | 0.0836  |
| C | -0.1745 | -5.1999 | -1.2799 |
| H | 0.6813  | -5.2995 | -1.9582 |
| H | -1.0681 | -5.2576 | -1.913  |
| C | -0.1772 | -6.3736 | -0.2996 |
| H | -1.0341 | -6.2774 | 0.3774  |
| H | 0.7161  | -6.3184 | 0.3336  |
| C | -0.2262 | -7.7411 | -0.9829 |
| H | 0.6308  | -7.8372 | -1.6584 |
| H | -1.1186 | -7.7955 | -1.616  |
| C | -0.2301 | -8.9087 | 0.0024  |
| H | 0.6674  | -8.9021 | 0.6265  |
| H | -0.2651 | -9.8686 | -0.517  |
| H | -1.0953 | -8.8606 | 0.6687  |

HOMO level energy = -4.6405 eV

LUMO level energy = -0.9035 eV

HOMO-LUMO gap energy = 3.737 eV.

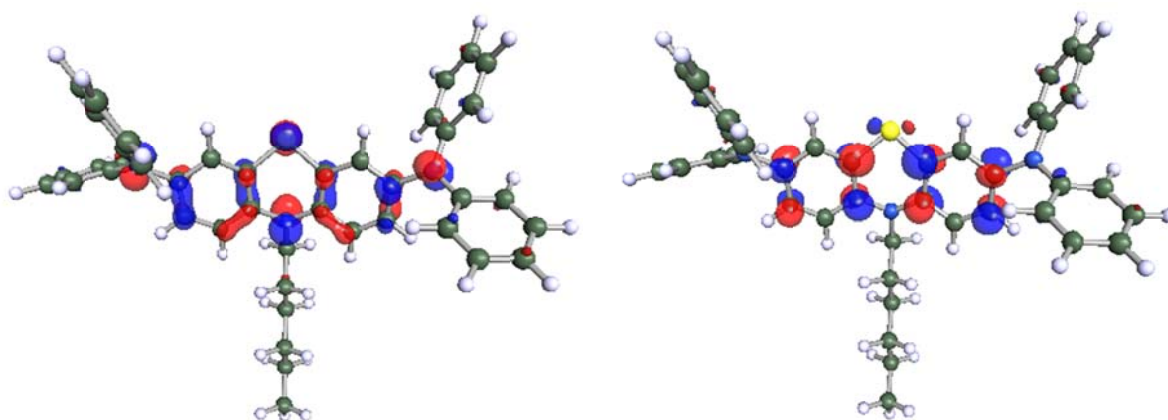

Figure 32: HOMO (left) and LUMO (right) levels of compound 3h

XYZ-coordinates for 10-Hexyl- $N^3,N^3,N^7,N^7$ -tetrakis(4-methoxyphenyl)-10H-phenothiazine-3,7-diamine **3i**

|   |         |         |         |
|---|---------|---------|---------|
| H | -2.1669 | -3.1576 | -0.4936 |
| C | -2.2295 | -2.1531 | -0.1056 |
| C | -2.4964 | 0.4245  | 0.8304  |
| C | -1.0909 | -1.5223 | 0.4102  |
| C | -3.4658 | -1.5219 | -0.1547 |
| C | -3.6233 | -0.2152 | 0.3037  |
| C | -1.2675 | -0.2161 | 0.9008  |
| H | -4.3122 | -2.0535 | -0.568  |
| H | -2.5827 | 1.4334  | 1.2129  |
| N | 0.1627  | -2.1649 | 0.4645  |
| S | 0.0384  | 0.6     | 1.7678  |
| C | 1.4324  | -0.1191 | 0.9532  |
| C | 3.7546  | -1.2579 | -0.0269 |
| C | 1.368   | -1.433  | 0.4545  |
| C | 2.6138  | 0.6078  | 0.9308  |
| C | 3.8018  | 0.0533  | 0.4428  |
| C | 2.5659  | -1.9771 | -0.0234 |
| H | 2.6143  | 1.6177  | 1.3199  |
| H | 2.5885  | -2.98   | -0.4193 |
| H | 4.6515  | -1.7255 | -0.4096 |
| C | 0.2172  | -3.61   | 0.2558  |
| H | -0.6489 | -4.0433 | 0.7608  |

|   |         |         |         |
|---|---------|---------|---------|
| H | 1.095   | -3.9826 | 0.7885  |
| C | 0.2564  | -4.1068 | -1.1992 |
| H | 1.1347  | -3.7054 | -1.7095 |
| H | -0.6047 | -3.7206 | -1.7496 |
| C | 0.2712  | -5.6346 | -1.2762 |
| H | -0.6135 | -6.0337 | -0.7654 |
| H | 1.1364  | -6.0197 | -0.723  |
| C | 0.3094  | -6.1718 | -2.7072 |
| H | 1.1954  | -5.7771 | -3.2184 |
| H | -0.555  | -5.7866 | -3.261  |
| C | 0.3194  | -7.699  | -2.7896 |
| H | -0.5658 | -8.0931 | -2.2783 |
| H | 1.184   | -8.0842 | -2.2378 |
| C | 0.355   | -8.2257 | -4.2232 |
| H | 1.2477  | -7.8781 | -4.75   |
| H | 0.3602  | -9.3174 | -4.2473 |
| H | -0.5154 | -7.8858 | -4.7908 |
| N | 5.0032  | 0.7995  | 0.4392  |
| N | -4.8728 | 0.4434  | 0.2456  |
| C | 4.9959  | 2.168   | 0.0623  |
| C | 4.9872  | 4.8854  | -0.6671 |
| C | 5.7678  | 3.1044  | 0.7633  |
| C | 4.2271  | 2.621   | -1.0079 |
| C | 4.2081  | 3.9666  | -1.3667 |
| C | 5.7721  | 4.4379  | 0.3992  |
| H | 6.3713  | 2.7765  | 1.5997  |
| H | 3.6232  | 1.9176  | -1.5662 |
| H | 3.5915  | 4.2767  | -2.1983 |
| H | 6.3691  | 5.1586  | 0.9433  |
| C | 6.2374  | 0.1521  | 0.71    |
| C | 8.6772  | -1.1368 | 1.2568  |
| C | 6.3662  | -0.7098 | 1.8077  |
| C | 7.3529  | 0.3557  | -0.0994 |
| C | 8.5674  | -0.2705 | 0.1715  |
| C | 7.5616  | -1.3516 | 2.0713  |
| H | 5.5149  | -0.8769 | 2.455   |
| H | 7.2785  | 1.0186  | -0.9517 |
| H | 9.4092  | -0.0824 | -0.4795 |
| H | 7.6581  | -2.017  | 2.9197  |
| C | -6.0686 | -0.2816 | 0.491   |
| C | -8.4379 | -1.7145 | 0.9862  |

|   |          |         |         |
|---|----------|---------|---------|
| C | -6.1737  | -1.1396 | 1.5938  |
| C | -7.1709  | -0.1577 | -0.3521 |
| C | -8.3511  | -0.8553 | -0.1072 |
| C | -7.3343  | -1.8517 | 1.8327  |
| H | -5.3318  | -1.2477 | 2.2654  |
| H | -7.113   | 0.4994  | -1.2103 |
| H | -9.1838  | -0.7284 | -0.7842 |
| H | -7.4127  | -2.514  | 2.6855  |
| C | -4.9431  | 1.8171  | -0.1038 |
| C | -5.098   | 4.5373  | -0.8058 |
| C | -4.1742  | 2.3344  | -1.155  |
| C | -5.7863  | 2.6885  | 0.5831  |
| C | -5.877   | 4.0333  | 0.234   |
| C | -4.2421  | 3.6734  | -1.4935 |
| H | -3.5135  | 1.6773  | -1.7053 |
| H | -6.3889  | 2.3124  | 1.3997  |
| H | -6.5464  | 4.6737  | 0.7904  |
| H | -3.6447  | 4.0703  | -2.3044 |
| O | 5.0497   | 6.2214  | -0.9394 |
| O | 9.812    | -1.8107 | 1.6045  |
| O | -9.539   | -2.4522 | 1.3118  |
| O | -5.1012  | 5.8372  | -1.2222 |
| C | 4.2618   | 6.7311  | -2.0008 |
| H | 4.5436   | 6.2858  | -2.9604 |
| H | 4.4553   | 7.8013  | -2.0319 |
| H | 3.1944   | 6.5622  | -1.8254 |
| C | -5.9412  | 6.7587  | -0.5503 |
| H | -5.7825  | 7.7197  | -1.0352 |
| H | -5.6796  | 6.842   | 0.5095  |
| H | -6.9963  | 6.4799  | -0.6397 |
| C | -10.6869 | -2.3522 | 0.4877  |
| H | -11.0766 | -1.3293 | 0.4638  |
| H | -11.4327 | -3.0097 | 0.9297  |
| H | -10.4771 | -2.6811 | -0.5353 |
| C | 10.9753  | -1.6245 | 0.8178  |
| H | 10.8174  | -1.9478 | -0.2161 |
| H | 11.7477  | -2.2416 | 1.2723  |
| H | 11.2998  | -0.5789 | 0.822   |

HOMO level energy = -4.3061 eV

LUMO level energy = -0.6946 eV

HOMO-LUMO gap energy = 3.612 eV.

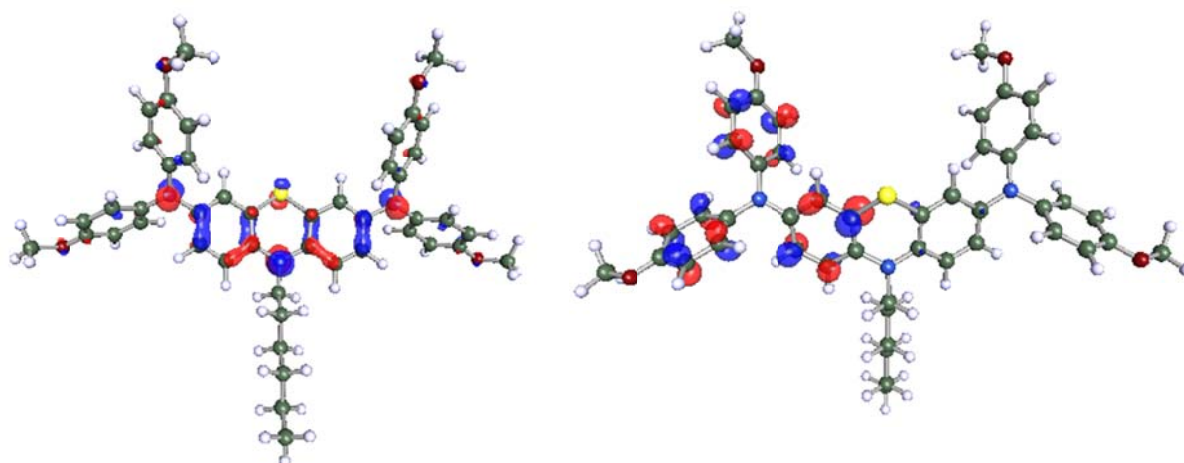

Figure 33: HOMO (left) and LUMO (right) levels of compound **3i**

XYZ-coordinates for *N*<sup>3</sup>,*N*<sup>3</sup>,*N*<sup>7</sup>,*N*<sup>7</sup>-tetraethyl-10-hexyl-10*H*-phenothiazine-3,7-diamine **3j**

|   |         |         |         |
|---|---------|---------|---------|
| H | 3.3761  | 0.5844  | -0.0487 |
| C | 2.6319  | 0.6749  | 0.7324  |
| C | 0.8002  | 0.8494  | 2.7862  |
| C | 1.3209  | 0.2623  | 0.4786  |
| C | 3.0102  | 1.2134  | 1.9508  |
| C | 2.1005  | 1.3218  | 3.019   |
| C | 0.4156  | 0.3652  | 1.5377  |
| H | 4.0284  | 1.5559  | 2.0668  |
| H | 0.0638  | 0.8396  | 3.5759  |
| N | 0.9427  | -0.2662 | -0.7763 |
| S | -1.28   | -0.0932 | 1.294   |
| C | -0.0198 | -1.2993 | -0.8337 |
| C | -1.9479 | -3.412  | -0.9361 |
| C | 0.0485  | -2.3117 | -1.79   |
| C | -1.0737 | -1.3746 | 0.0852  |

|   |         |         |         |
|---|---------|---------|---------|
| C | -1.9932 | -2.4152 | 0.0538  |
| C | -0.8996 | -3.3234 | -1.8675 |
| H | 0.8571  | -2.3067 | -2.5099 |
| H | -2.749  | -2.4481 | 0.8257  |
| H | -0.8065 | -4.0409 | -2.6684 |
| N | -2.8979 | -4.4395 | -0.9495 |
| N | 2.4971  | 1.8758  | 4.2421  |
| C | 1.499   | 2.0773  | 5.2851  |
| H | 1.3088  | 1.1435  | 5.841   |
| H | 0.563   | 2.3507  | 4.8003  |
| C | 1.8478  | 3.1889  | 6.2721  |
| H | 2.7521  | 2.9762  | 6.8436  |
| H | 1.0305  | 3.3024  | 6.9874  |
| H | 1.9842  | 4.1405  | 5.7554  |
| C | 3.8721  | 1.6426  | 4.6922  |
| H | 4.2787  | 0.7876  | 4.1475  |
| H | 3.8428  | 1.3397  | 5.7434  |
| C | 4.8115  | 2.8401  | 4.5378  |
| H | 5.8167  | 2.5763  | 4.8784  |
| H | 4.4683  | 3.6941  | 5.1224  |
| H | 4.8783  | 3.1587  | 3.4966  |
| C | -4.2575 | -4.1332 | -0.4979 |
| H | -4.4025 | -3.051  | -0.5328 |
| H | -4.963  | -4.5515 | -1.2226 |
| C | -4.6034 | -4.6497 | 0.9002  |
| H | -4.5364 | -5.7368 | 0.9515  |
| H | -5.623  | -4.3586 | 1.1668  |
| H | -3.9263 | -4.2413 | 1.6518  |
| C | -2.7636 | -5.5159 | -1.9226 |
| H | -1.7011 | -5.7093 | -2.0599 |
| H | -3.1617 | -5.2153 | -2.9064 |
| C | -3.4171 | -6.8277 | -1.4946 |
| H | -3.2314 | -7.5862 | -2.2582 |
| H | -4.4982 | -6.7418 | -1.3789 |
| H | -2.9983 | -7.1829 | -0.5516 |
| C | 1.2792  | 0.4702  | -1.9944 |
| H | 2.2856  | 0.8788  | -1.8931 |
| H | 1.3222  | -0.2307 | -2.8295 |
| C | 0.2977  | 1.6011  | -2.3234 |
| H | 0.2662  | 2.2983  | -1.4801 |
| H | -0.708  | 1.1796  | -2.4162 |

|   |         |        |         |
|---|---------|--------|---------|
| C | 0.6673  | 2.3507 | -3.6038 |
| H | 1.6809  | 2.7586 | -3.5086 |
| H | 0.7036  | 1.6441 | -4.4421 |
| C | -0.2987 | 3.4857 | -3.9464 |
| H | -0.3329 | 4.1953 | -3.1113 |
| H | -1.313  | 3.0805 | -4.0391 |
| C | 0.0634  | 4.2355 | -5.2294 |
| H | 1.0779  | 4.6388 | -5.1372 |
| H | 0.0947  | 3.5266 | -6.0643 |
| C | -0.9058 | 5.3691 | -5.5612 |
| H | -0.9324 | 6.1134 | -4.7607 |
| H | -1.9233 | 4.9923 | -5.6932 |
| H | -0.6201 | 5.8829 | -6.4817 |

HOMO level energy = -4.3362 eV

LUMO level energy = -0.2550 eV

HOMO-LUMO gap energy = 4.081 eV.

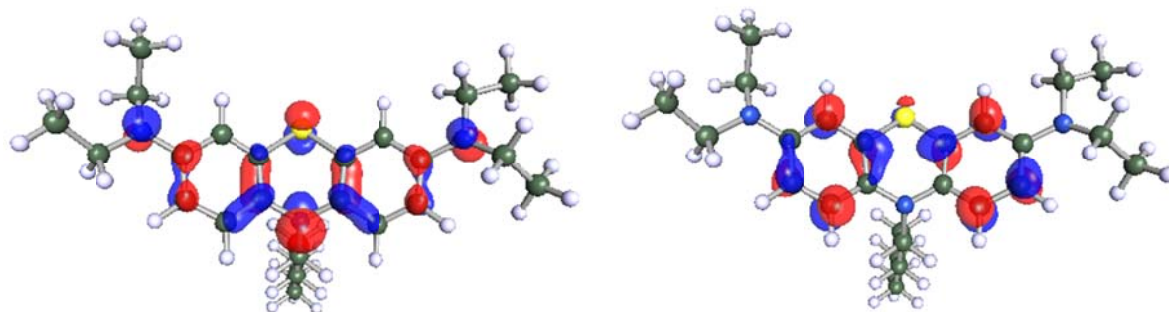

Figure 34: HOMO (left) and LUMO (right) levels of compound **3j**



XYZ-coordinates for 10-Hexyl-3,7-di(piperidin-1-yl)-10*H*-phenothiazine **3k**

|   |         |         |         |
|---|---------|---------|---------|
| H | 2.2227  | -1.1762 | 2.4543  |
| C | 2.2872  | -0.5226 | 1.5938  |
| C | 2.4738  | 1.2449  | -0.5193 |
| C | 1.1641  | -0.349  | 0.776   |
| C | 3.4755  | 0.1428  | 1.3504  |
| C | 3.6007  | 1.047   | 0.2842  |
| C | 1.2873  | 0.55    | -0.2862 |
| H | 4.3041  | -0.0020 | 2.0312  |
| H | 2.5063  | 1.9265  | -1.3573 |
| N | -0.0491 | -1.02   | 1.0341  |
| S | -0.0624 | 0.7551  | -1.4199 |
| C | -1.4171 | 0.5236  | -0.2973 |
| C | -3.5995 | 0.0907  | 1.3433  |
| C | -1.2765 | -0.367  | 0.7717  |
| C | -2.6096 | 1.1971  | -0.5375 |
| C | -3.7443 | 0.9842  | 0.2652  |
| C | -2.3925 | -0.5451 | 1.5914  |
| H | -2.6535 | 1.8669  | -1.3845 |
| H | -2.3166 | -1.1871 | 2.4601  |
| H | -4.4176 | -0.0758 | 2.0289  |
| N | -4.9405 | 1.6349  | 0.0142  |
| N | 4.8111  | 1.7476  | 0.0911  |
| C | -6.1857 | 1.1776  | 0.6182  |
| H | -6.3418 | 1.617   | 1.6161  |
| H | -6.128  | 0.0965  | 0.7579  |
| C | -4.9954 | 2.7966  | -0.8648 |
| H | -5.0909 | 2.5042  | -1.9225 |
| H | -4.0564 | 3.3465  | -0.7757 |
| C | -7.3753 | 1.4997  | -0.2853 |
| H | -8.2864 | 1.1012  | 0.1664  |
| H | -7.2368 | 0.9663  | -1.2296 |
| C | -6.1494 | 3.7176  | -0.4718 |
| H | -5.9701 | 4.0689  | 0.5482  |
| H | -6.1351 | 4.6022  | -1.1119 |
| C | -7.514  | 3.0099  | -0.5511 |
| H | -8.1974 | 3.4607  | 0.1726  |
| H | -7.9634 | 3.1641  | -1.5353 |
| C | 4.8024  | 2.8752  | -0.8324 |
| H | 3.8972  | 3.4574  | -0.6586 |

|   |         |         |         |
|---|---------|---------|---------|
| H | 4.7757  | 2.5354  | -1.884  |
| C | 6.0253  | 0.9331  | -0.0261 |
| H | 5.9762  | 0.1158  | 0.6899  |
| H | 6.0763  | 0.4746  | -1.0302 |
| C | 7.2827  | 1.7648  | 0.2128  |
| H | 7.2899  | 2.1069  | 1.2526  |
| H | 8.1628  | 1.1314  | 0.072   |
| C | 6.0271  | 3.7665  | -0.6228 |
| H | 5.9584  | 4.2288  | 0.3667  |
| H | 6.0079  | 4.5749  | -1.3591 |
| C | 7.3275  | 2.9702  | -0.7271 |
| H | 8.1867  | 3.606   | -0.4993 |
| H | 7.4589  | 2.6206  | -1.7579 |
| C | -0.034  | -2.4575 | 1.3007  |
| H | -0.9558 | -2.724  | 1.818   |
| H | 0.7775  | -2.6896 | 1.9926  |
| C | 0.1088  | -3.3131 | 0.036   |
| H | 1.0291  | -3.0269 | -0.483  |
| H | -0.7169 | -3.0776 | -0.6423 |
| C | 0.1272  | -4.8126 | 0.3344  |
| H | -0.7934 | -5.0909 | 0.862   |
| H | 0.9503  | -5.0377 | 1.0231  |
| C | 0.2698  | -5.6809 | -0.9169 |
| H | -0.5519 | -5.457  | -1.6066 |
| H | 1.1904  | -5.405  | -1.4448 |
| C | 0.2878  | -7.1823 | -0.6254 |
| H | -0.6332 | -7.4583 | -0.0999 |
| H | 1.1086  | -7.4056 | 0.0648  |
| C | 0.4329  | -8.0402 | -1.8817 |
| H | 0.4425  | -9.1052 | -1.6397 |
| H | 1.3619  | -7.812  | -2.4109 |
| H | -0.3925 | -7.8648 | -2.5765 |

HOMO level energy = -4.3244 eV

LUMO level energy = -0.2176 eV

HOMO-LUMO gap energy = 4.107 eV.

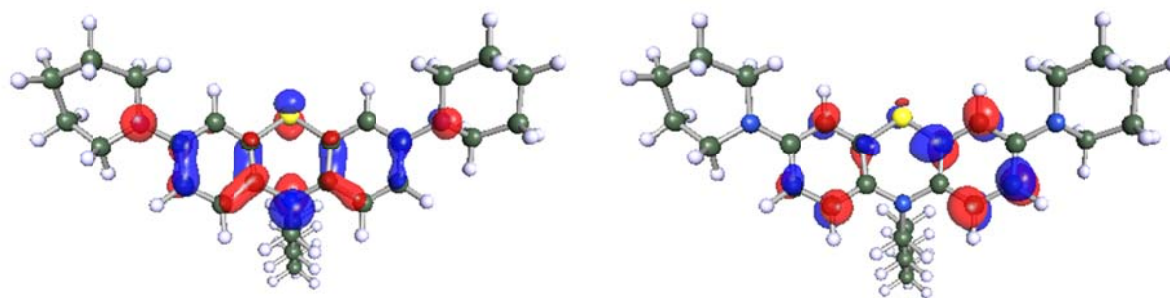

Figure 35: HOMO (left) and LUMO (right) levels of compound **3k**

XYZ-coordinates for 10-Hexyl-3,7-di(pyrrolidin-1-yl)-10*H*-phenothiazine **3l**

|   |         |         |         |
|---|---------|---------|---------|
| C | -7.1143 | -0.1285 | 1.0847  |
| C | -7.1072 | -0.9366 | -0.065  |
| C | -6.0036 | -0.8131 | -0.9294 |
| C | -4.99   | 0.0997  | -0.6706 |
| C | -4.9971 | 0.9056  | 0.4755  |
| C | -6.0745 | 0.7536  | 1.3495  |
| S | -3.6693 | 0.2956  | -1.838  |
| C | -2.3491 | 0.6012  | -0.6937 |
| C | -2.6192 | 1.3472  | 0.4612  |
| N | -3.9348 | 1.8149  | 0.6972  |
| C | -1.0741 | 0.1334  | -0.9812 |
| C | 0.0128  | 0.4204  | -0.1352 |
| C | -0.2609 | 1.1522  | 1.0326  |
| C | -1.5488 | 1.5827  | 1.3255  |
| C | -4.1412 | 2.9488  | 1.5891  |
| C | -5.2084 | 3.9334  | 1.0958  |
| C | -4.8492 | 4.6249  | -0.2203 |
| C | -5.9202 | 5.6075  | -0.6958 |
| C | -5.5698 | 6.306   | -2.0108 |
| C | -6.6432 | 7.2877  | -2.4792 |
| N | -8.1313 | -1.8173 | -0.3352 |
| N | 1.2856  | -0.0131 | -0.4347 |
| C | -9.3245 | -1.9386 | 0.4886  |
| C | -10.242 | -2.8465 | -0.335  |

|   |          |         |         |
|---|----------|---------|---------|
| C | -9.2583  | -3.7322 | -1.1085 |
| C | -8.0984  | -2.7825 | -1.4253 |
| C | 1.6051   | -0.8413 | -1.5881 |
| C | 3.0641   | -1.2427 | -1.3537 |
| C | 3.6333   | -0.0604 | -0.5608 |
| C | 2.4637   | 0.3624  | 0.3335  |
| H | -7.9267  | -0.199  | 1.7938  |
| H | -5.936   | -1.4185 | -1.8221 |
| H | -6.1185  | 1.3364  | 2.2593  |
| H | -0.9291  | -0.4458 | -1.8822 |
| H | 0.5293   | 1.3674  | 1.7378  |
| H | -1.711   | 2.1114  | 2.255   |
| H | -3.1936  | 3.4829  | 1.6464  |
| H | -4.377   | 2.6259  | 2.6139  |
| H | -5.3436  | 4.6852  | 1.8815  |
| H | -6.1703  | 3.426   | 0.9901  |
| H | -4.6804  | 3.8672  | -0.9904 |
| H | -3.8975  | 5.1569  | -0.1012 |
| H | -6.092   | 6.3649  | 0.0789  |
| H | -6.8716  | 5.0753  | -0.8141 |
| H | -5.4031  | 5.5499  | -2.7851 |
| H | -4.6174  | 6.8351  | -1.8951 |
| H | -6.3634  | 7.7671  | -3.4199 |
| H | -6.8066  | 8.0768  | -1.7404 |
| H | -7.5994  | 6.7815  | -2.6366 |
| H | -9.7765  | -0.9597 | 0.6765  |
| H | -9.0968  | -2.3852 | 1.4681  |
| H | -10.9339 | -3.4144 | 0.2871  |
| H | -10.833  | -2.2442 | -1.0295 |
| H | -9.6916  | -4.1747 | -2.0056 |
| H | -8.9064  | -4.547  | -0.4708 |
| H | -7.1389  | -3.3077 | -1.4607 |
| H | -8.237   | -2.2926 | -2.3999 |
| H | 1.4907   | -0.2835 | -2.5292 |
| H | 0.9457   | -1.7128 | -1.6455 |
| H | 3.106    | -2.1539 | -0.7521 |
| H | 3.5982   | -1.4328 | -2.2849 |
| H | 3.8948   | 0.7551  | -1.2395 |
| H | 4.525    | -0.3161 | 0.0122  |
| H | 2.4949   | -0.1555 | 1.3029  |
| H | 2.4746   | 1.4374  | 0.5404  |

HOMO level energy = -4.2404 eV

LUMO level energy = -0.1274 eV

HOMO-LUMO gap energy = 4.113 eV.

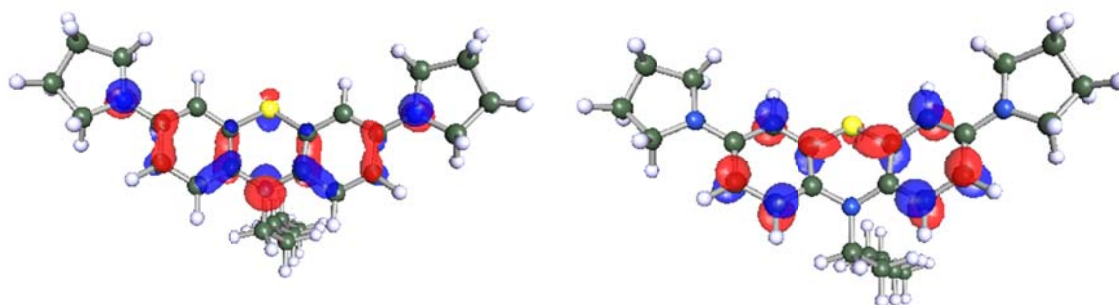

Figure 36: HOMO (left) and LUMO (right) levels of compound 3I

## 5 Correlation graphs of selected experimental and computational electronic data of the structures 3a-3l

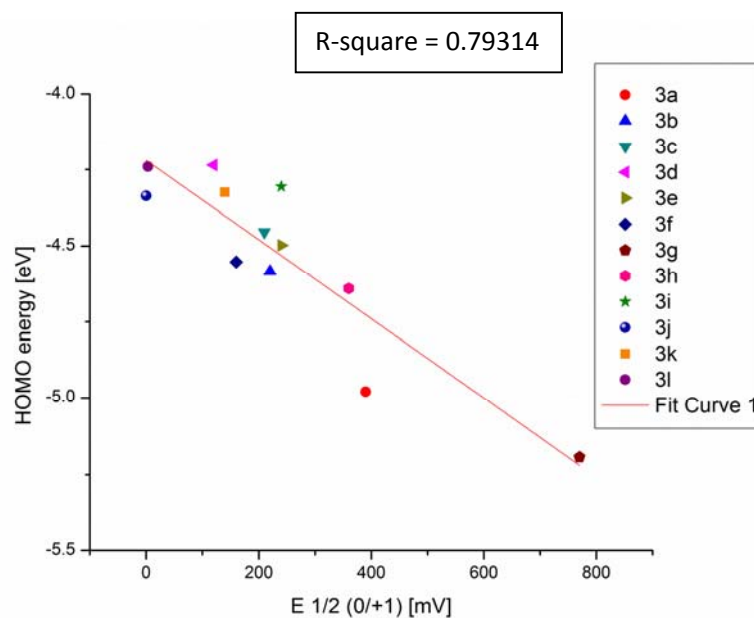

Figure 37: Correlation between the HOMO energy and the first oxidation potential for the 3,7-dianilino substituted *N*-hexyl phenothiazines **3a-3l**

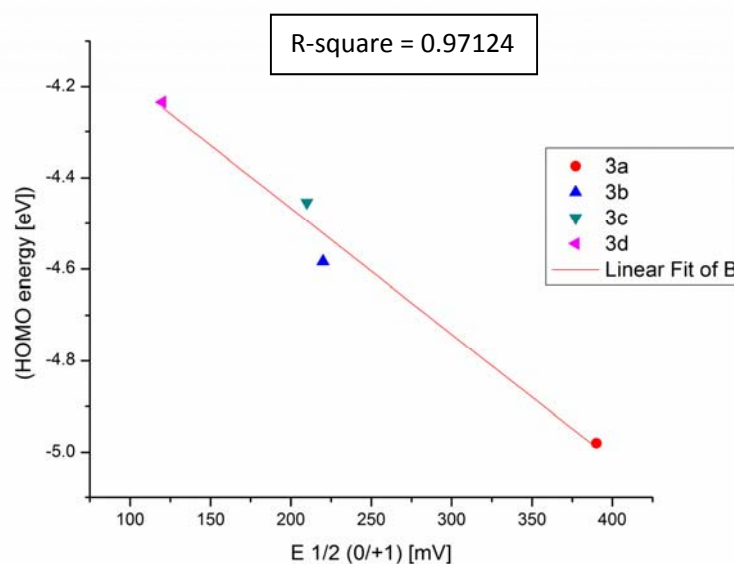

Figure 38: Correlation between the HOMO energy and the first oxidation potential for the consanguineous series **3a-3d**

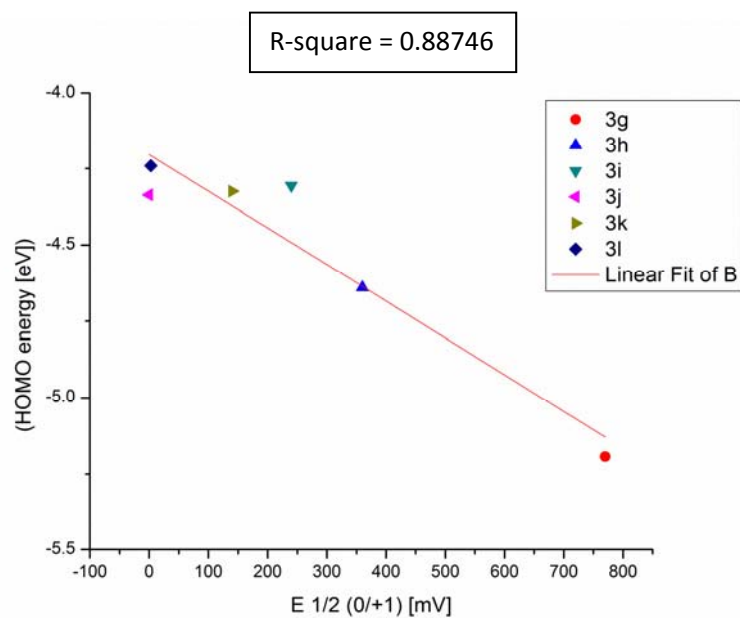

Figure 39: Correlation between the HOMO energy and the first oxidation potential for the consanguineous series **3g-3l**

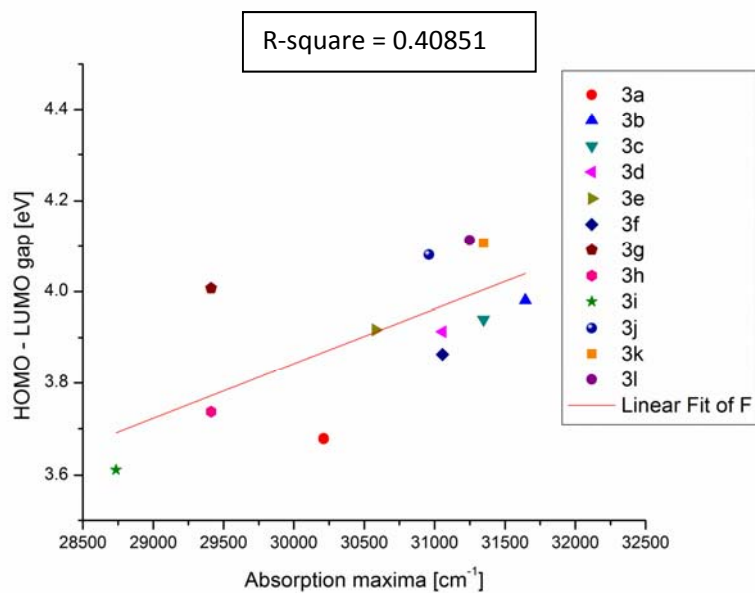

Figure 40: Correlation between the HOMO – LUMO energy gap and the absorption maxima energy for the 3,7-dianilino substituted *N*-hexyl phenothiazines **3a-3l**

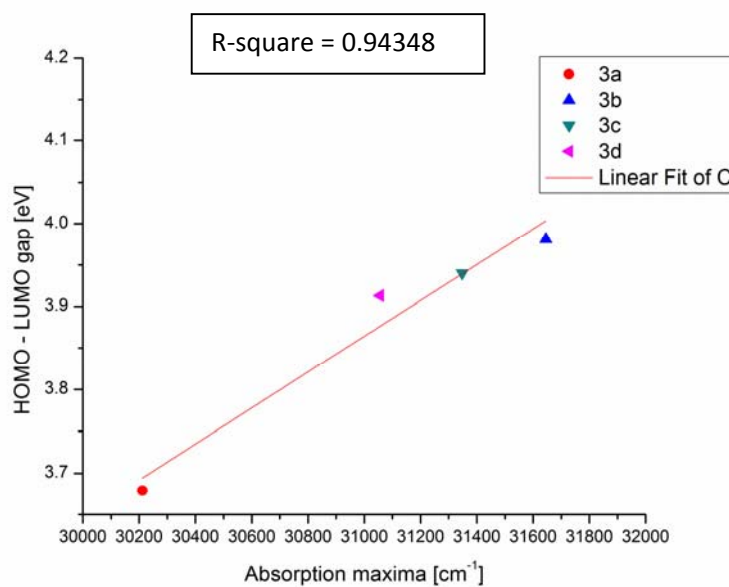

**Figure 41:** Correlation between the HOMO – LUMO energy gap and the absorption maxima energy for the consanguineous series **3a-3d**

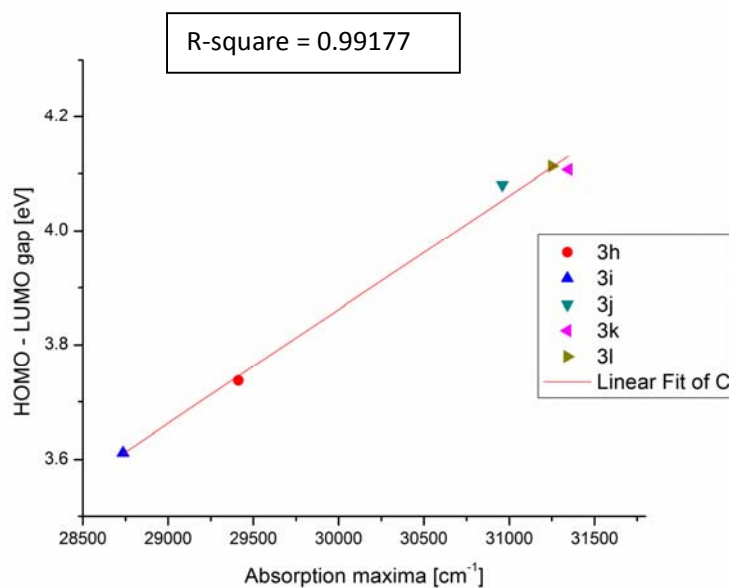

**Figure 42:** Correlation between the HOMO – LUMO energy gap and the absorption maxima energy for the consanguineous series **3h-3l**
